# Supplementary material for: A comprehensive survey of bat sarbecoviruses across China for the origin tracing of SARS-CoV and SARS-CoV-2
Source: Research Square preprint supplement (doi:10.21203/rs.3.rs-885194/v1), 2021-09-20
Supplement: Supplementary file 2 [file c8245382a4115cc4ae23f329.xlsx]

## Sheet: Table S1
Table S1 Data Source of Bat Sarbecovirus
In MCC tree	Accession Number of Genbank/GISAID/ National Genomics Data Center of China	Loaction	Species	Collection Date	Reference PMID	Complete CDS	Strain
	AB889995	Japan	Rhinolophus pusillus	2013	NA		Is39
	AB889996	Japan	Rhinolophus pusillus	2013	NA		Is58
In	AB889997	Japan	Rhinolophus pusillus	2013	NA		Is63
In	AB889998	Japan	Rhinolophus pusillus	2013	NA		Is66
In	AB889999	Japan	Rhinolophus pusillus	2013	NA		Is68
	AB890000	Japan	Rhinolophus pusillus	2013	NA		Og44
In	DQ022305	China-HK	Rhinolophus sinicus	2005	16169905	Yes	HKU3-1
	DQ071613	China-GX	Rhinolophus pearsonii	2004	16195424		Rp1
	DQ071614	China-GX	Rhinolophus pearsonii	2004	16195424		Rp2
In	DQ071615	China-GX	Rhinolophus pearsonii	2004	16195424	Yes	Rp3
In	DQ084199	China-HK	Rhinolophus sinicus	2005	16169905	Yes	HKU3-2
	DQ084200	China-HK	Rhinolophus sinicus	2005	16169905	Yes	HKU3-3
In	DQ412042	China-HB	Rhinolophus ferrumequinum	2004	16195424	Yes	Rf1
In	DQ412043	China-HB	Rhinolophus macrotis	2004	16195424	Yes	Rm1
	DQ648795	China-SD	Rhinolophus sinicus	2005	16840328		A1018/2005
In	DQ648856	China-HB	Rhinolophus ferrumequinum	2004	16840328	Yes	273/2005
In	DQ648857	China-HB	Rhinolophus macrotis	2004	16840328	Yes	279/2005
	EPI_ISL_412976	China-YN	Rhinolophus malayanus	2019	32416074	Yes	RmYN01
In	EPI_ISL_412977	China-YN	Rhinolophus malayanus	2019	32416074	Yes	RmYN02
In	EPI_ISL_852604	Cambodia	Rhinolophus shameli	2010	bioRxiv	Yes	RShSTT182
	EPI_ISL_852605	Cambodia	Rhinolophus shameli	2010	bioRxiv	Yes	RShSTT200
	EPI_ISL_1699443	China-YN	Rhinolophus sinicus	2019	bioRxiv	Yes	RsYN03
In	EPI_ISL_1699444	China-YN	Rhinolophus stheno	2020	bioRxiv	Yes	RsYN04
In	EPI_ISL_1699445	China-YN	Rhinolophus malayanus	2020	bioRxiv	Yes	RmYN05
In	EPI_ISL_1699446	China-YN	Rhinolophus pusillus	2020	bioRxiv	Yes	RpYN06
In	EPI_ISL_1699447	China-YN	Rhinolophus malayanus	2020	bioRxiv	Yes	RmYN07
	EPI_ISL_1699448	China-YN	Rhinolophus malayanus	2020	bioRxiv	Yes	RmYN08
In	EPI_ISL_1699449	China-YN	Rhinolophus stheno	2020	bioRxiv	Yes	RsYN09
In	FJ588686	China-GZ	Rhinolophus sinicus	2006	20016037	Yes	Rs672
	GQ153539	China-HK	Rhinolophus sinicus	2005	20071579	Yes	HKU3-4
	GQ153540	China-HK	Rhinolophus sinicus	2005	20071579	Yes	HKU3-5
In	GQ153541	China-HK	Rhinolophus sinicus	2005	20071579	Yes	HKU3-6
In	GQ153542	China-GD	Rhinolophus sinicus	2006	20071579	Yes	HKU3-7
	GQ153543	China-GD	Rhinolophus sinicus	2006	20071579	Yes	HKU3-8
In	GQ153544	China-HK	Rhinolophus sinicus	2006	20071579	Yes	HKU3-9
	GQ153545	China-HK	Rhinolophus sinicus	2006	20071579	Yes	HKU3-10
	GQ153546	China-HK	Rhinolophus sinicus	2007	20071579	Yes	HKU3-11
In	GQ153547	China-HK	Rhinolophus sinicus	2007	20071579	Yes	HKU3-12
	GQ153548	China-HK	Rhinolophus sinicus	2007	20071579	Yes	HKU3-13
	GQ404795	Slovenia	Rhinolophus hipposideros	2008	20217155		SLO1A0066/SVN
	GQ404796	Slovenia	Rhinolophus hipposideros	2008	20217155		SLO1A0050/SVN
	GQ404797	Slovenia	Rhinolophus hipposideros	2008	20217155		SLO1A0082/SVN
In	GU190215	Bulgaria	Rhinolophus blasii	2008	20686038	Yes	BM48-31
	GU190217	Bulgaria	Rhinolophus blasii	2008	20686038		BB98-16
	GU190221	Bulgaria	Rhinolophus euryale	2008	20686038		BR98-19
	GU190223	Bulgaria	Rhinolophus euryale	2008	20686038		BM98-13
	GU190224	Bulgaria	Rhinolophus euryale	2008	20686038		BM48-12
	GU190226	Bulgaria	Rhinolophus euryale	2008	20686038		BB98-43
	GU190230	Bulgaria	Rhinolophus ferrumequinum	2008	20686038		BM48-35
In	GU190231	Bulgaria	Rhinolophus ferrumequinum	2008	20686038		BNM98-29
In	JQ649535	Rwanda	Rhinolophus clivosus	2008	NA		Rwanda/441
	JQ649536	Rwanda	Rhinolophus clivosus	2008	NA		Rwanda/445
In	JX993987	China-SN	Rhinolophus pusillus	2011	23739658	Yes	Rp/Shaanxi2011
In	JX993988	China-YN	Chaerephon plicatus	2010	23739658	Yes	Cp/Yunnan2011
In	KC633198	Italy	Rhinolophus ferrumequinum	2009	NA		It1/ITA/2009
	KC633199	Italy	Rhinolophus ferrumequinum	2009	NA		It17/ITA/2009
In	KC633200	Italy	Rhinolophus ferrumequinum	2009	NA		It2/ITA/2009
In	KC633201	Bulgaria	Rhinolophus blasii	2008	NA		BB98-22
In	KC633202	Bulgaria	Rhinolophus euryale	2009	NA		BB99-04
	KC633203	Bulgaria	Rhinolophus euryale	2008	NA		BB98-98
In	KC633204	Bulgaria	Rhinolophus euryale	2008	NA		BB98-92
In	KC633205	Italy	Rhinolophus ferrumequinum	2009	NA		It13/ITA/2009
	KC633206	Italy	Rhinolophus ferrumequinum	2009	NA		It15/ITA/2009
In	KC633207	France	Rhinolophus ferrumequinum	2011	NA		FR0711-B3
In	KC633208	France	Rhinolophus ferrumequinum	2011	NA		FR0711-B11
In	KC881005	China-YN	Rhinolophus sinicus	2011	24172901	Yes	RsSHC014
	KC881006	China-YN	Rhinolophus sinicus	2012	24172901	Yes	Rs3367
	KF294420	China-ZJ	Rhinolophus pusillus	2012	28384506		Longquan-82
In	KF294421	China-ZJ	Rhinolophus sinicus	2012	28384506		Longquan-89
	KF294422	China-ZJ	Rhinolophus pusillus	2012	28384506		Longquan-94
	KF294423	China-ZJ	Rhinolophus pusillus	2012	28384506		Longquan-96
	KF294424	China-ZJ	Rhinolophus pusillus	2012	28384506		Longquan-100
In	KF294425	China-ZJ	Rhinolophus thomasi	2012	28384506		Longquan-103
	KF294426	China-ZJ	Rhinolophus pusillus	2012	28384506		Longquan-105
	KF294427	China-ZJ	Rhinolophus pusillus	2012	28384506		Longquan-106
	KF294428	China-ZJ	Rhinolophus pusillus	2012	28384506		Longquan-110
	KF294429	China-ZJ	Rhinolophus pusillus	2012	28384506		Longquan-112
	KF294430	China-ZJ	Rhinolophus pusillus	2012	28384506		Longquan-114
In	KF294431	China-ZJ	Rhinolophus pusillus	2012	28384506		Longquan-119
	KF294432	China-ZJ	Rhinolophus sinicus	2012	28384506		Longquan-126
In	KF294433	China-ZJ	Rhinolophus sinicus	2012	28384506		Longquan-127
	KF294434	China-ZJ	Rhinolophus pusillus	2012	28384506		Longquan-129
	KF294435	China-ZJ	Rhinolophus pusillus	2012	28384506		Longquan-131
	KF294436	China-ZJ	Rhinolophus pusillus	2012	28384506		Longquan-132
In	KF294437	China-ZJ	Rhinolophus pusillus	2012	28384506		Longquan-138
	KF294438	China-ZJ	Rhinolophus pusillus	2012	28384506		Longquan-142
	KF294439	China-GZ	Rhinolophus sinicus	2012	28384506		Anlong-29
In	KF294440	China-GZ	Rhinolophus sinicus	2012	28384506		Anlong-97
In	KF294441	China-GZ	Rhinolophus sinicus	2012	28384506		Anlong-300
In	KF294442	China-ZJ	Rhinolophus pusillus	2012	28384506		Longquan-4
In	KF294443	China-ZJ	Rhinolophus pearsonii	2012	28384506		Longquan-7
	KF294444	China-ZJ	Rhinolophus pusillus	2012	28384506		Longquan-17
	KF294445	China-ZJ	Rhinolophus pusillus	2012	28384506		Longquan-20
	KF294446	China-ZJ	Rhinolophus pusillus	2012	28384506		Longquan-32
	KF294447	China-ZJ	Rhinolophus pusillus	2012	28384506		Longquan-33
	KF294448	China-ZJ	Rhinolophus pusillus	2012	28384506		Longquan-34
	KF294449	China-ZJ	Rhinolophus pusillus	2012	28384506		Longquan-36
	KF294450	China-ZJ	Rhinolophus pusillus	2012	28384506		Longquan-39
	KF294451	China-ZJ	Rhinolophus pusillus	2012	28384506		Longquan-45
	KF294452	China-ZJ	Rhinolophus pusillus	2012	28384506		Longquan-51
	KF294453	China-ZJ	Rhinolophus pusillus	2012	28384506		Longquan-76
In	KF294454	China-ZJ	Rhinolophus pusillus	2012	28384506		Longquan-79
In	KF294455	China-GZ	Rhinolophus rex	2012	28384506		Anlong-111
In	KF294456	China-HA	Rhinolophus ferrumequinum	2012	28384506		Jiyuan-331
In	KF294457	China-ZJ	Rhinolophus pusillus	2012	28384506	Yes	Longquan-140
In	KF367457	China-YN	Rhinolophus sinicus	2012	24172901	Yes	WIV1
	KF500952	Italy	Rhinolophus hipposideros	2012	24184965		Italy/187632-2/2012
In	KF500953	Italy	Rhinolophus hipposideros	2011	24184965		Italy/196814/2011
In	KF500954	Italy	Rhinolophus hipposideros	2012	24184965		Italy/243585/2012
In	KF569973	China-YN	Rhinolophus affinis	2011	24719429		LYRa3
	KF569996	China-YN	Rhinolophus affinis	2011	24719429	Yes	LYRa11
In	KJ473811	China-JL	Rhinolophus ferrumequinum	2012	26433221	Yes	JL2012
In	KJ473812	China-HE	Rhinolophus ferrumequinum	2013	26433221	Yes	HeB2013
In	KJ473813	China-SX	Rhinolophus ferrumequinum	2013	26433221	Yes	SX2013
In	KJ473814	China-HB	Rhinolophus sinicus	2013	26433221	Yes	Rs-HuB2013
In	KJ473815	China-GX	Rhinolophus sinicus	2013	26433221	Yes	GX2013
In	KJ473816	China-YN	Rhinolophus sinicus	2013	26433221	Yes	YN2013
In	KJ473818	China-HB	Rhinolophus ferrumequinum	2013	26433221		Rf-HuB2013
In	KJ473819	China-HB	Myotis daubentonii	2013	26433221		Md-HuB2013
	KJ652335	Hungary	Rhinolophus euryale	2013	25514120		BtCoV/E63/HUN/2013
In	KP886808	China-YN	Rhinolophus ferrumequinum	2013	26269185	Yes	YNLF_31C
	KP886809	China-YN	Rhinolophus ferrumequinum	2013	26269185	Yes	YNLF_34C
In	KT381914	China-TW	Rhinolophus pusillus	2013	27178103		CYCU-R9/TW/2013
In	KT444582	China	Rhinolophus sinicus	2013	26719272	Yes	WIV16
In	KU182963	China-YN	Rhinolophus sinicus	2012	26847648		MLHJC35
In	KU182964	China-JL	Rhinolophus ferrumequinum	2013	26847648	Yes	JTMC15
In	KU973686	China-YN	Rhinolophus pusillus	2012	28352124		F21
	KU973687	China-YN	Rhinolophus pusillus	2012	28352124		F22
	KU973688	China-YN	Rhinolophus pusillus	2012	28352124		F23
In	KU973690	China-YN	Rhinolophus pusillus	2012	28352124		F29
In	KU973692	China-YN	Rhinolophus pusillus	2012	28352124	Yes	F46
In	KX284939	Malaysia	Hipposideros galeritus	2012	28630747		CoV-51/PSW 00163
In	KX285125	China-AH	Rhinolophus sinicus	2011	28630747		EHA-156-11-AH-SXD002
In	KX285135	China-AH	Hipposideros armiger	2013	28630747		EHA-156-12-AH-YLD018
	KX285136	China-AH	Hipposideros armiger	2013	28630747		EHA-156-12-AH-YLD023
In	KX285156	China-BJ	Rhinolophus ferrumequinum	2013	28630747		EHA-156-12-BJ-FS029
In	KX285180	China-GD	Rhinolophus sinicus	2013	28630747		EHA-156-12-HZ13479
In	KX285181	China-GD	Rhinolophus sinicus	2013	28630747		EHA-156-12-HZ13484
	KX285182	China-GD	Rhinolophus sinicus	2013	28630747		EHA-156-12-HZ13488
	KX285220	China-GD	Rhinolophus sinicus	2013	28630747		EHA-156-12-NL13973
In	KX447563	China-GD	Rhinolophus sinicus	2015	31067830		152075
	KX447564	China-GD	Rhinolophus sinicus	2015	31067830		152090
In	KX447565	China-GD	Rhinolophus sinicus	2015	31067830		152116
In	KY352407	Kenya	Rhinolophus spp.	2007	31296683	Yes	BtKY72
In	KY417142	China-YN	Aselliscus stoliczkanus	2014	29190287	Yes	As6526
In	KY417143	China-YN	Rhinolophus sinicus	2012	29190287	Yes	Rs4081
	KY417144	China-YN	Rhinolophus sinicus	2012	29190287	Yes	Rs4084
In	KY417145	China-YN	Rhinolophus ferrumequinum	2012	29190287	Yes	Rf4092
In	KY417146	China-YN	Rhinolophus sinicus	2013	29190287	Yes	Rs4231
In	KY417147	China-YN	Rhinolophus sinicus	2013	29190287	Yes	Rs4237
	KY417148	China-YN	Rhinolophus sinicus	2013	29190287	Yes	Rs4247
In	KY417149	China-YN	Rhinolophus sinicus	2013	29190287	Yes	Rs4255
	KY417150	China-YN	Rhinolophus sinicus	2013	29190287	Yes	Rs4874
In	KY417151	China-YN	Rhinolophus sinicus	2014	29190287	Yes	Rs7327
In	KY417152	China-YN	Rhinolophus sinicus	2015	29190287	Yes	Rs9401
	KY423375	France	Rhinolophus ferrumequinum	2014	29482919		FRA_EPI1_Rhfer23_G3_P10
	KY423376	France	Rhinolophus ferrumequinum	2015	29482919		FRA_EPI1_Rhfer975_2C_P23
	KY423377	France	Rhinolophus ferrumequinum	2015	29482919		FRA_EPI1_3889_5C_P30
	KY423378	France	Rhinolophus ferrumequinum	2015	29482919		FRA_EPI1_3958_1H_p31
	KY423379	France	Rhinolophus ferrumequinum	2014	29482919		FRA_EPI1_Rhfer33_A5_P10
	KY423380	France	Rhinolophus ferrumequinum	2015	29482919		FRA_EPI1_Rhfer60_5C_P29
	KY423381	France	Rhinolophus ferrumequinum	2014	29482919		FRA_EPI1_Rhfer61_E8_P10
	KY423382	France	Rhinolophus ferrumequinum	2015	29482919		FRA_EPI1_Rhfer67_6B_P29
	KY423383	France	Rhinolophus ferrumequinum	2014	29482919		FRA_EPI1_Rhfer47_G6_P10
	KY423384	France	Rhinolophus ferrumequinum	2015	29482919		FRA_EPI1_Rhfer46_3E_P29
	KY423385	France	Rhinolophus ferrumequinum	2015	29482919		FRA_EPI1_Rhfer66_6A_P29
	KY423386	France	Rhinolophus ferrumequinum	2015	29482919		FRA_EPI1_Rhfer59_11B_P29
	KY423387	France	Rhinolophus ferrumequinum	2015	29482919		FRA_EPI1_Rhfer59_5B_P29
	KY423388	France	Rhinolophus ferrumequinum	2014	29482919		FRA_EPI1_Rhfer17_A3_P10
	KY423389	France	Rhinolophus ferrumequinum	2014	29482919		FRA_EPI1_Rhfer19_C3_P10
	KY423390	France	Rhinolophus ferrumequinum	2014	29482919		FRA_EPI1_Rhfer1_A1_P10
	KY423391	France	Rhinolophus ferrumequinum	2014	29482919		FRA_EPI1_Rhfer57_A8_P10
	KY423392	France	Rhinolophus ferrumequinum	2014	29482919		FRA_EPI1_Rhfer42_B6_P10
	KY423393	France	Rhinolophus ferrumequinum	2014	29482919		FRA_EPI1_Rhfer63_G8_P10
	KY423394	France	Rhinolophus ferrumequinum	2014	29482919		FRA_EPI1_Rhfer39_G5_P10
	KY423395	France	Rhinolophus ferrumequinum	2015	29482919		FRA_EPI1_4015_9A_p31
	KY423396	France	Rhinolophus ferrumequinum	2015	29482919		FRA_EPI1_4000_7B_p31
	KY423397	France	Rhinolophus ferrumequinum	2015	29482919		FRA_EPI1_3875_3E_P30
	KY423398	France	Rhinolophus ferrumequinum	2015	29482919		FRA_EPI1_3880_4B_P30
	KY423399	France	Rhinolophus ferrumequinum	2015	29482919		FRA_EPI1_3932_10F_P30
	KY423400	France	Rhinolophus ferrumequinum	2015	29482919		FRA_EPI1_3965_2G_p31
In	KY423401	France	Rhinolophus ferrumequinum	2015	29482919		FRA_EPI1_3971_3E_p31
	KY423402	France	Rhinolophus ferrumequinum	2015	29482919		FRA_EPI1_3877_3G_P30
	KY423403	France	Rhinolophus ferrumequinum	2014	29482919		FRA_EPI1_Rhfer.pool1_B11_P10
	KY423404	France	Rhinolophus ferrumequinum	2015	29482919		FRA_EPI1_3978_4D_p31
	KY423405	France	Rhinolophus ferrumequinum	2015	29482919		FRA_EPI1_4023_10A_p31
	KY423406	France	Rhinolophus ferrumequinum	2015	29482919		FRA_EPI1_4019_9E_p31
	KY423407	France	Rhinolophus ferrumequinum	2015	29482919		FRA_EPI1_3925_9G_P30
	KY423408	France	Rhinolophus ferrumequinum	2015	29482919		FRA_EPI1_3921_9C_P30
	KY423409	France	Rhinolophus ferrumequinum	2015	29482919		FRA_EPI1_3924_9F_P30
	KY423410	France	Rhinolophus ferrumequinum	2015	29482919		FRA_EPI1_3928_10B_P30
	KY423411	France	Rhinolophus ferrumequinum	2015	29482919		FRA_EPI1_3944_12B_P30
	KY423412	Spain	Rhinolophus ferrumequinum	2015	29482919		SPA_EPI1_Rhfer25_6H_P24
	KY423413	Spain	Rhinolophus ferrumequinum	2015	29482919		SPA_EPI1_Rhfer19_12B_P24
	KY423414	France	Rhinolophus ferrumequinum	2015	29482919		FRA_EPI1_3956_1F_p31
	KY423415	France	Rhinolophus ferrumequinum	2015	29482919		FRA_EPI1_4006_7H_p31
In	KY423416	France	Rhinolophus ferrumequinum	2015	29482919		FRA_EPI1_3952_1B_p31
	KY423417	France	Rhinolophus ferrumequinum	2015	29482919		FRA_EPI1_4016_9B_p31
	KY423418	France	Rhinolophus ferrumequinum	2015	29482919		FRA_EPI1_3957_1G_p31
	KY423419	France	Rhinolophus ferrumequinum	2015	29482919		FRA_EPI1_3940_11F_P30
	KY423420	France	Rhinolophus ferrumequinum	2015	29482919		FRA_EPI1_3870_2H_P30
	KY423421	France	Rhinolophus ferrumequinum	2015	29482919		FRA_EPI1_3871_3A_P30
	KY423422	France	Rhinolophus ferrumequinum	2015	29482919		FRA_EPI1_3879_4A_P30
	KY423423	France	Rhinolophus ferrumequinum	2015	29482919		FRA_EPI1_3894_5H_P30
	KY423424	France	Rhinolophus ferrumequinum	2015	29482919		FRA_EPI1_3899_6E_P30
	KY423425	France	Rhinolophus ferrumequinum	2015	29482919		FRA_EPI1_3882_4D_P30
	KY423426	France	Rhinolophus ferrumequinum	2015	29482919		FRA_EPI1_3930_10D_P30
	KY423427	France	Rhinolophus ferrumequinum	2015	29482919		FRA_EPI1_4005_7G_p31
	KY423428	France	Rhinolophus ferrumequinum	2015	29482919		FRA_EPI1_3881_4C_P30
	KY423429	France	Rhinolophus ferrumequinum	2015	29482919		FRA_EPI1_3959_2A_p31
	KY423430	France	Rhinolophus ferrumequinum	2015	29482919		FRA_EPI1_3897_6C_P30
	KY423431	France	Rhinolophus ferrumequinum	2015	29482919		FRA_EPI1_3874_3D_P30
	KY423432	France	Rhinolophus ferrumequinum	2015	29482919		FRA_EPI1_3900_6F_P30
In	KY423433	France	Rhinolophus ferrumequinum	2015	29482919		FRA_EPI1_3968_3B_p31
	KY423434	France	Rhinolophus ferrumequinum	2015	29482919		FRA_EPI1_3923_9E_P30
	KY423435	Spain	Rhinolophus ferrumequinum	2015	29482919		SPA_EPI1_Rhfer13_11D_P24
	KY423436	Spain	Rhinolophus ferrumequinum	2015	29482919		SPA_EPI1_Rhfer15_11F_P24
	KY423437	France	Rhinolophus ferrumequinum	2015	29482919		FRA_EPI1_3975_4A_p31
	KY423438	France	Rhinolophus ferrumequinum	2015	29482919		FRA_EPI1_3966_2H_p31
In	KY432455	South Korea	Rhinolophus ferrumequinum	2016	NA		16BO122
	KY432457	South Korea	Rhinolophus ferrumequinum	2016	NA		16BO132
	KY432465	South Korea	Rhinolophus ferrumequinum	2016	NA		16BO150
	KY432466	South Korea	Rhinolophus ferrumequinum	2016	NA		16BO154
In	KY502395	Luxembourg	Rhinolophus ferrumequinum	2016	28710271		LUX16_A_24/2016
	KY502396	Luxembourg	Rhinolophus ferrumequinum	2016	28710271		LUX16_A_37/2016
In	KY770858	China-GZ	Rhinolophus sinicus	2013	28384506	Yes	Anlong-103
	KY770859	China-GZ	Rhinolophus sinicus	2013	28384506	Yes	Anlong-112
In	KY770860	China-HA	Rhinolophus ferrumequinum	2012	28384506	Yes	Jiyuan-84
	KY780394	Italy	Rhinolophus ferrumequinum	2016	29273042		Rfer4027_IT_16
	KY780399	Italy	Rhinolophus ferrumequinum	2016	29273042		Rfer4674_IT_16
	KY780400	Italy	Rhinolophus ferrumequinum	2016	29273042		Rfer4675_IT_2016
In	KY938558	South Korea	Rhinolophus ferrumequinum	2016	NA	Yes	16BO133
In	LC556375	Japan	Rhinolophus pusillus	2013	33219796	Yes	Rc-o319
	MG772844	China-ZJ	Rhinolophus pusillus	2016	30209269		bat-SL-CoVDXC86
In	MG772845	China-ZJ	Rhinolophus pusillus	2016	30209269		bat-SL-CoVDXC83
	MG772846	China-ZJ	Rhinolophus pusillus	2016	30209269		bat-SL-CoVDXC80
	MG772847	China-ZJ	Rhinolophus pusillus	2016	30209269		bat-SL-CoVDXC74
	MG772848	China-ZJ	Rhinolophus pusillus	2016	30209269		bat-SL-CoVDXC73
In	MG772849	China-ZJ	Rhinolophus pusillus	2016	30209269		bat-SL-CoVDXC66
	MG772850	China-ZJ	Rhinolophus pusillus	2016	30209269		bat-SL-CoVDXC63
	MG772851	China-ZJ	Rhinolophus pusillus	2016	30209269		bat-SL-CoVDXC61
	MG772852	China-ZJ	Rhinolophus pusillus	2016	30209269		bat-SL-CoVDXC59
	MG772853	China-ZJ	Rhinolophus pusillus	2016	30209269		bat-SL-CoVDXC55
	MG772854	China-ZJ	Rhinolophus pusillus	2016	30209269		bat-SL-CoVDXC53
	MG772855	China-ZJ	Rhinolophus pusillus	2016	30209269		bat-SL-CoVDXC49
	MG772856	China-ZJ	Rhinolophus pusillus	2016	30209269		bat-SL-CoVDXC40
In	MG772857	China-ZJ	Rhinolophus pusillus	2016	30209269		bat-SL-CoVDXC39
	MG772858	China-ZJ	Rhinolophus pusillus	2016	30209269		bat-SL-CoVDXC33
	MG772859	China-ZJ	Rhinolophus pusillus	2016	30209269		bat-SL-CoVDXC29
	MG772860	China-ZJ	Rhinolophus pusillus	2016	30209269		bat-SL-CoVDXC13
	MG772861	China-ZJ	Rhinolophus pusillus	2016	30209269		bat-SL-CoVDXC2
	MG772862	China-ZJ	Rhinolophus pusillus	2016	30209269		bat-SL-CoVZ2_113
	MG772863	China-ZJ	Rhinolophus pusillus	2016	30209269		bat-SL-CoVZ2_110
	MG772864	China-ZJ	Rhinolophus pusillus	2016	30209269		bat-SL-CoVZ2_109
	MG772865	China-ZJ	Rhinolophus pusillus	2016	30209269		bat-SL-CoVZ2_106
	MG772866	China-ZJ	Rhinolophus pusillus	2016	30209269		bat-SL-CoVZ2_105
In	MG772867	China-ZJ	Rhinolophus pusillus	2016	30209269		bat-SL-CoVZ2_99
	MG772868	China-ZJ	Rhinolophus pusillus	2016	30209269		bat-SL-CoVZ2_88
	MG772869	China-ZJ	Rhinolophus pusillus	2016	30209269		bat-SL-CoVZ2_85
	MG772870	China-ZJ	Rhinolophus pusillus	2016	30209269		bat-SL-CoVZ2_76
	MG772871	China-ZJ	Rhinolophus pusillus	2016	30209269		bat-SL-CoVZ2_75
	MG772872	China-ZJ	Rhinolophus pusillus	2016	30209269		bat-SL-CoVZ2_74
	MG772873	China-ZJ	Rhinolophus pusillus	2016	30209269		bat-SL-CoVZ2_72
	MG772874	China-ZJ	Rhinolophus pusillus	2016	30209269		bat-SL-CoVZ2_67
	MG772875	China-ZJ	Rhinolophus pusillus	2016	30209269		bat-SL-CoVZ2_65
	MG772876	China-ZJ	Rhinolophus pusillus	2016	30209269		bat-SL-CoVZ2_63
	MG772877	China-ZJ	Rhinolophus pusillus	2016	30209269		bat-SL-CoVZ2_60
	MG772878	China-ZJ	Rhinolophus pusillus	2016	30209269		bat-SL-CoVZ2_56
	MG772879	China-ZJ	Rhinolophus pusillus	2016	30209269		bat-SL-CoVZ2_46
	MG772880	China-ZJ	Rhinolophus pusillus	2016	30209269		bat-SL-CoVZ2_45
	MG772881	China-ZJ	Rhinolophus pusillus	2016	30209269		bat-SL-CoVZ2_39
	MG772882	China-ZJ	Rhinolophus pusillus	2016	30209269		bat-SL-CoVZ2_13
	MG772883	China-ZJ	Rhinolophus pusillus	2016	30209269		bat-SL-CoVZ2_16
	MG772884	China-ZJ	Rhinolophus pusillus	2016	30209269		bat-SL-CoVZ2_11
	MG772885	China-ZJ	Rhinolophus pusillus	2016	30209269		bat-SL-CoVZ2_9
	MG772886	China-ZJ	Rhinolophus pusillus	2016	30209269		bat-SL-CoVZ2_8
	MG772887	China-ZJ	Rhinolophus pusillus	2016	30209269		bat-SL-CoVZ2_5
	MG772888	China-ZJ	Rhinolophus pusillus	2016	30209269		bat-SL-CoVZ2_4
	MG772889	China-ZJ	Rhinolophus pusillus	2016	30209269		bat-SL-CoVZ2_3
	MG772890	China-ZJ	Rhinolophus pusillus	2016	30209269		bat-SL-CoVZ2_2
	MG772891	China-ZJ	Rhinolophus pusillus	2016	30209269		bat-SL-CoVZ2_1
	MG772892	China-ZJ	Rhinolophus pusillus	2015	30209269		bat-SL-CoVZC79
	MG772893	China-ZJ	Rhinolophus pusillus	2015	30209269		bat-SL-CoVZC67
	MG772894	China-ZJ	Rhinolophus pusillus	2015	30209269		bat-SL-CoVZC52
	MG772895	China-ZJ	Rhinolophus pusillus	2015	30209269		bat-SL-CoVZC45
	MG772896	China-ZJ	Rhinolophus pusillus	2015	30209269		bat-SL-CoVZC39
	MG772897	China-ZJ	Rhinolophus pusillus	2015	30209269		bat-SL-CoVZC35
	MG772898	China-ZJ	Rhinolophus pusillus	2015	30209269		bat-SL-CoVZC25
	MG772899	China-ZJ	Rhinolophus pusillus	2015	30209269		bat-SL-CoVZC21
	MG772900	China-ZJ	Rhinolophus pusillus	2015	30209269		bat-SL-CoVZC16
	MG772901	China-ZJ	Rhinolophus pusillus	2015	30209269		bat-SL-CoVZC9
	MG772902	China-ZJ	Rhinolophus pusillus	2015	30209269		bat-SL-CoVZC3
	MG772903	China-ZJ	Rhinolophus pusillus	2017	30209269		bat-SL-CoVZXC44
	MG772904	China-ZJ	Rhinolophus pusillus	2017	30209269		bat-SL-CoVZXC43
	MG772905	China-ZJ	Rhinolophus pusillus	2017	30209269		bat-SL-CoVZXC42
	MG772906	China-ZJ	Rhinolophus pusillus	2017	30209269		bat-SL-CoVZXC41
	MG772907	China-ZJ	Rhinolophus pusillus	2017	30209269		bat-SL-CoVZXC38
	MG772908	China-ZJ	Rhinolophus pusillus	2017	30209269		bat-SL-CoVZXC37
In	MG772909	China-ZJ	Rhinolophus pusillus	2017	30209269		bat-SL-CoVZXC36
	MG772910	China-ZJ	Rhinolophus pusillus	2017	30209269		bat-SL-CoVZXC34
	MG772911	China-ZJ	Rhinolophus pusillus	2017	30209269		bat-SL-CoVZXC33
	MG772912	China-ZJ	Rhinolophus pusillus	2017	30209269		bat-SL-CoVZXC31
	MG772913	China-ZJ	Rhinolophus pusillus	2017	30209269		bat-SL-CoVZXC29
	MG772914	China-ZJ	Rhinolophus pusillus	2017	30209269		bat-SL-CoVZXC28
	MG772915	China-ZJ	Rhinolophus pusillus	2017	30209269		bat-SL-CoVZXC27
	MG772916	China-ZJ	Rhinolophus pusillus	2017	30209269		bat-SL-CoVZXC26
In	MG772917	China-ZJ	Rhinolophus pusillus	2017	30209269		bat-SL-CoVZXC25
	MG772918	China-ZJ	Rhinolophus pusillus	2017	30209269		bat-SL-CoVZXC24
	MG772919	China-ZJ	Rhinolophus pusillus	2017	30209269		bat-SL-CoVZXC23
	MG772920	China-ZJ	Rhinolophus pusillus	2017	30209269		bat-SL-CoVZXC22
	MG772921	China-ZJ	Rhinolophus pusillus	2017	30209269		bat-SL-CoVZXC21
	MG772922	China-ZJ	Rhinolophus pusillus	2017	30209269		bat-SL-CoVZXC18
	MG772923	China-ZJ	Rhinolophus pusillus	2017	30209269		bat-SL-CoVZXC15
	MG772924	China-ZJ	Rhinolophus pusillus	2017	30209269		bat-SL-CoVZXC12
In	MG772925	China-ZJ	Rhinolophus pusillus	2017	30209269		bat-SL-CoVZXC11
	MG772926	China-ZJ	Rhinolophus pusillus	2017	30209269		bat-SL-CoVZXC8
	MG772927	China-ZJ	Rhinolophus pusillus	2017	30209269		bat-SL-CoVZXC7
	MG772928	China-ZJ	Rhinolophus pusillus	2017	30209269		bat-SL-CoVZXC6
	MG772929	China-ZJ	Rhinolophus pusillus	2017	30209269		bat-SL-CoVZXC5
	MG772930	China-ZJ	Rhinolophus pusillus	2017	30209269		bat-SL-CoVZXC4
In	MG772933	China-ZJ	Rhinolophus pusillus	2017	30209269	Yes	bat-SL-CoVZC45
In	MG772934	China-ZJ	Rhinolophus pusillus	2015	30209269	Yes	bat-SL-CoVZXC21
	MG975784	Italy	Rhinolophus ferrumequinum	NA	NA		SarBatCoV1
In	MK211374	China-SC	Rhinolophus sinicus	2016	31474969	Yes	SC2018
In	MK211375	China-YN	Rhinolophus sinicus	2016	31474969	Yes	YN2018A
In	MK211376	China-YN	Rhinolophus sinicus	2016	31474969	Yes	YN2018B
In	MK211377	China-YN	Rhinolophus sinicus	2016	31474969	Yes	YN2018C
In	MK211378	China-YN	Rhinolophus sinicus	2016	31474969	Yes	YN2018D
	MK991933	South Korea	Rhinolophus ferrumequinum	2018	NA		B18-74
	MK991934	South Korea	Rhinolophus ferrumequinum	2018	NA		B18-82
In	MK991936	South Korea	Rhinolophus ferrumequinum	2018	NA		B18-92
	MK991946	South Korea	Rhinolophus ferrumequinum	2018	NA		B18-168
In	MK991947	South Korea	Rhinolophus ferrumequinum	2018	NA		B18-171
	MN312595	China	Rhinolophus sinicus	2015	33199918		6233
	MN312596	China	Rhinolophus sinicus	2015	33199918		6255
	MN312597	China	Unknown	2015	33199918		6266
In	MN312598	China	Hipposideros armiger	2015	33199918		6278
	MN312599	China	Unknown	2015	33199918		6301
	MN312600	China	Rhinolophus sinicus	2015	33199918		6303
In	MN312601	China	Aselliscus stoliczkanus	2015	33199918		6500
In	MN312602	China	Rhinolophus affinis	2015	33199918		6530
	MN312603	China	Aselliscus stoliczkanus	2015	33199918		6533
	MN312604	China	Rhinolophus sinicus	2015	33199918		7325
	MN312605	China	Rhinolophus sinicus	2015	33199918		7326
	MN312606	China	Rhinolophus sinicus	2015	33199918		7330
	MN312607	China	Aselliscus stoliczkanus	2015	33199918		7335
	MN312632/ GWHBAUN01000000	China-YN	Rhinolophus stheno	2015	32843626	Yes	Rs7905
	MN312633/ GWHBAUO01000000	China-YN	Rhinolophus stheno	2015	32843626	Yes	Rs7907
In	MN312634/ GWHBAUP01000000	China-YN	Rhinolophus affinis	2015	32843626	Yes	Ra7909 & RaTG15
	MN312635/ GWHBAUQ01000000	China-YN	Rhinolophus stheno	2015	32843626	Yes	Rs7921
	MN312636/ GWHBAUR01000000	China-YN	Rhinolophus stheno	2015	32843626	Yes	Rs7924
	MN312637	China	Rhinolophus sinicus	2014	33199918		141335
	MN312638	China	Rhinolophus sinicus	2014	33199918		141341
	MN312639	China	Rhinolophus sinicus	2014	33199918		141342
	MN312640	China	Rhinolophus sinicus	2014	33199918		141344
	MN312641	China	Rhinolophus sinicus	2014	33199918		141350
	MN312642	China	Rhinolophus sinicus	2014	33199918		141352
	MN312643	China	Rhinolophus sinicus	2014	33199918		141369
	MN312644	China	Rhinolophus sinicus	2014	33199918		141375
	MN312645	China	Rhinolophus sinicus	2014	33199918		141376
	MN312650	China	Rhinolophus sinicus	2014	33199918		141455
	MN312651	China	Rhinolophus spp.	2014	33199918		141456
	MN312652	China	Rhinolophus pusillus	2014	33199918		141460
	MN312653	China	Rhinolophus sinicus	2014	33199918		141464
	MN312654	China	Rhinolophus sinicus	2014	33199918		141470
In	MN312655	China	Rhinolophus spp.	2014	33199918		141567
	MN312656	China	Rhinolophus pusillus	2014	33199918		141569
	MN312657	China	Rhinolophus sinicus	2014	33199918		141570
	MN312658	China	Hipposideros pomona	2014	33199918		141575
	MN312659	China	Hipposideros pomona	2014	33199918		141577
	MN312660	China	Rhinolophus pusillus	2014	33199918		141579
In	MN312661	China	Hipposideros pomona	2014	33199918		141582
	MN312662	China	Rhinolophus pusillus	2014	33199918		141598
	MN312663	China	Rhinolophus pusillus	2014	33199918		141599
	MN312664	China	Rhinolophus pusillus	2014	33199918		141600
In	MN312671/ GWHBAUM01000000	China-YN	Rhinolophus stheno	2015	32843626	Yes	Rs7896
	MN312672/ GWHBAUS01000000	China-YN	Rhinolophus stheno	2015	32843626	Yes	Rs7931
In	MN312673/ GWHBAUT01000000	China-YN	Rhinolophus stheno	2015	32843626	Yes	Rs7952
	MN312688	China	Rhinolophus sinicus	2015	33199918		8363
	MN312691	China	Rhinolophus sinicus	2015	33199918		151161
	MN312692	China	Rhinolophus sinicus	2015	33199918		151162
	MN312693	China	Rhinolophus sinicus	2015	33199918		151199
	MN312694	China	Rhinolophus sinicus	2015	33199918		151200
	MN312695	China	Rhinolophus sinicus	2015	33199918		151239
	MN312696	China	Rhinolophus sinicus	2015	33199918		151256
	MN312697	China	Rhinolophus sinicus	2015	33199918		151262
	MN312698	China	Rhinolophus sinicus	2015	33199918		151267
	MN312699	China	Rhinolophus sinicus	2015	33199918		151268
	MN312700	China	Rhinolophus sinicus	2015	33199918		151270
	MN312701	China	Rhinolophus sinicus	2015	33199918		151271
	MN312702	China	Rhinolophus sinicus	2015	33199918		151334
	MN312703	China	Rhinolophus sinicus	2015	33199918		151388
	MN312704	China	Rhinolophus sinicus	2015	33199918		151491
	MN312705	China	Rhinolophus sinicus	2015	33199918		151493
	MN312706	China	Rhinolophus sinicus	2015	33199918		151503
	MN312707	China	Rhinolophus sinicus	2015	33199918		151507
	MN312708	China	Rhinolophus sinicus	2015	33199918		151512
	MN312709	China	Rhinolophus sinicus	2015	33199918		151513
	MN312710	China	Rhinolophus sinicus	2015	33199918		151514
	MN312711	China	Rhinolophus sinicus	2015	33199918		151569
	MN312738	China	Rhinolophus sinicus	2015	33199918		8548
	MN312739	China	Rhinolophus sinicus	2015	33199918		8561
	MN312740	China	Rhinolophus sinicus	2015	33199918		8572
	MN312741	China	Rhinolophus sinicus	2015	33199918		8586
	MN312742	China	Rhinolophus pusillus	2015	33199918		8794
	MN312814	China	Rhinolophus sinicus	2015	33199918		9201
	MN312815	China	Rhinolophus sinicus	2015	33199918		9214
	MN312816	China	Rhinolophus sinicus	2015	33199918		9215
	MN312818	China	Rhinolophus sinicus	2015	33199918		9400
	MN312819	China	Rhinolophus sinicus	2015	33199918		9403
	MN312820	China	Rhinolophus sinicus	2015	33199918		9406
	MN312821	China	Rhinolophus sinicus	2015	33199918		9408
	MN312826	China	Rhinolophus sinicus	2013	33199918		HD131601
	MN312829	China	Rhinolophus sinicus	2013	33199918		HZ13479
	MN312830	China	Rhinolophus sinicus	2013	33199918		HZ13484
	MN312831	China	Rhinolophus sinicus	2013	33199918		HZ13488
	MN312832	China	Rhinolophus ferrumequinum	2013	33199918		LQ131405
	MN312833	China	Rhinolophus ferrumequinum	2013	33199918		LQ131406
	MN312834	China	Rhinolophus ferrumequinum	2013	33199918		LQ131407
	MN312835	China	Rhinolophus ferrumequinum	2013	33199918		LQ131412
	MN312843	China	Rhinolophus pusillus	2014	33199918		NL140346
	MN312844	China	Rhinolophus pusillus	2014	33199918		NL140352
	MN312845	China	Rhinolophus sinicus	2014	33199918		NL140391
	MN312846	China	Rhinolophus sinicus	2014	33199918		NL140400
	MN312855	China	Hipposideros pratti	2014	33199918		NL140478
	MN312856	China	Hipposideros armiger	2014	33199918		NL140494
	MN312857	China	Rhinolophus ferrumequinum	2013	33199918		QS131514
	MN312858	China	Rhinolophus sinicus	2014	33199918		SZ140288
	MN312859	China	Rhinolophus sinicus	2014	33199918		SZ140289
	MN312867	China	Rhinolophus ferrumequinum	2013	33199918		YC131468
	MN312868	China	Rhinolophus ferrumequinum	2013	33199918		YC131481
In	MN312869	China	Rhinolophus ferrumequinum	2013	33199918		YX131457
In	MN996532/ EPI_ISL_402131	China-YN	Rhinolophus affinis	2013	33199918	Yes	RaTG13
	MT726043	Uganda	Rhinolophus sp.	2013	33754082	Yes	PDF-2386/OTBA40RSV
	MT726044	Uganda	Rhinolophus sp.	2013	33754082	Yes	PDF-2370/OTBA35RSV
	MT726045	Rwanda	Rhinolophus sp.	2013	33754082	Yes	PRD-0038/AABSMF
In	MW251308	Thailand	Rhinolophus acuminatus	2020	33563978	Yes	RacCS203
	MW251309	Thailand	Rhinolophus acuminatus	2020	33563978	Yes	RacCS224
	MW251310	Thailand	Rhinolophus acuminatus	2020	33563978	Yes	RacCS253
	MW251311	Thailand	Rhinolophus acuminatus	2020	33563978	Yes	RacCS264
	MW251312	Thailand	Rhinolophus acuminatus	2020	33563978	Yes	RacCS271
In	MW703458/ EPI_ISL_1098866	China-YN	Rhinolophus pusillus	2018	bioRxiv	Yes	PrC31
	MW719567	United Kingdom	Rhinolophus hipposideros	2020	34282196	Yes	RhGB01
	MW880971	Lebanon	Rhinolophus ferrumequinum	2020	NA		LB20-CO-BAT-46A
	MW880972	Lebanon	Rhinolophus ferrumequinum	2020	NA		LB20-CO-BAT-92A
	MW880973	Lebanon	Rhinolophus ferrumequinum	2020	NA		LB20-CO-BAT-137A
	MW880976	Lebanon	Rhinolophus ferrumequinum	2020	NA		LB20-CO-BAT-100A
	MW880978	Lebanon	Rhinolophus ferrumequinum	2020	NA		LB20-CO-BAT-78A
	MW880979	Lebanon	Rhinolophus ferrumequinum	2020	NA		LB20-CO-BAT-116A
	MW880982	Lebanon	Rhinolophus ferrumequinum	2020	NA		LB20-CO-BAT-58A
	MW880983	Lebanon	Rhinolophus ferrumequinum	2020	NA		LB20-CO-BAT-80A
	MW880984	Lebanon	Rhinolophus ferrumequinum	2020	NA		LB20-CO-BAT-14A
	MW880987	Lebanon	Rhinolophus ferrumequinum	2020	NA		LB20-CO-BAT-162A
	MW880988	Lebanon	Rhinolophus ferrumequinum	2020	NA		LB20-CO-BAT-93A
	MW880989	Lebanon	Rhinolophus ferrumequinum	2020	NA		LB20-CO-BAT-70A
	MW880990	Lebanon	Rhinolophus ferrumequinum	2020	NA		LB20-CO-BAT-132A
	MW880991	Lebanon	Rhinolophus ferrumequinum	2020	NA		LB20-CO-BAT-56A
	MW880993	Lebanon	Rhinolophus ferrumequinum	2020	NA		LB20-CO-BAT-22A
	MW880995	Lebanon	Rhinolophus ferrumequinum	2020	NA		LB20-CO-BAT-96A
	MW880996	Lebanon	Rhinolophus ferrumequinum	2020	NA		LB20-CO-BAT-85A
	MW880998	Lebanon	Rhinolophus ferrumequinum	2020	NA		LB20-CO-BAT-91A
	MW880999	Lebanon	Rhinolophus ferrumequinum	2020	NA		LB20-CO-BAT-26A
	MW881004	Lebanon	Rhinolophus ferrumequinum	2020	NA		LB20-CO-BAT-60A
	MW881006	Lebanon	Rhinolophus ferrumequinum	2020	NA		LB20-CO-BAT-19A
	MW881007	Lebanon	Rhinolophus ferrumequinum	2020	NA		LB20-CO-BAT-89A
	MW881008	Lebanon	Rhinolophus ferrumequinum	2020	NA		LB20-CO-BAT-87A
	MW881011	Lebanon	Rhinolophus ferrumequinum	2020	NA		LB20-CO-BAT-20A
	MW881013	Lebanon	Rhinolophus ferrumequinum	2020	NA		LB20-CO-BAT-126A
	MZ190137	Russia	Rhinolophus ferrumequinum	2020	bioRxiv	Yes	Khosta-1
	MZ190138	Russia	Rhinolophus hipposideros	2020	bioRxiv	Yes	Khosta-2
	MZ558550	Croatia	Mix	2020	NA		BD10
	OK017594	China: Hubei	Rhinolophus sinicus	2020	This research		HB2020F
In	OK017595	China: Guangdong	Rhinolophus sinicus	2016	This research		GD2016A
	OK017596	China: Guangdong	Rhinolophus sinicus	2017	This research		GD2017R
In	OK017597	China: Guangdong	Rhinolophus sinicus	2017	This research		GD2017S
	OK017598	China: Guangdong	Rhinolophus sinicus	2017	This research		GD2017T
	OK017599	China: Guangdong	Rhinolophus sinicus	2017	This research		GD2017U
In	OK017600	China: Guangdong	Rhinolophus sinicus	2017	This research		GD2017V
	OK017601	China: Guangdong	Rhinolophus sinicus	2017	This research		GD2017X
In	OK017602	China: Guangdong	Rhinolophus sinicus	2017	This research		GD2017Y
In	OK017603	China: Guangdong	Rhinolophus sinicus	2017	This research		GD2017Z
In	OK017604	China: Guangdong	Rhinolophus sinicus	2019	This research		GD2019C
In	OK017605	China: Yunnan	Rhinolophus sinicus	2017	This research		YN2017A
In	OK017606	China: Yunnan	Rhinolophus sinicus	2017	This research		YN2017B
In	OK017607	China: Yunnan	Rhinolophus sinicus	2017	This research		YN2017C
In	OK017608	China: Yunnan	Rhinolophus sinicus	2017	This research		YN2017D
In	OK017609	China: Yunnan	Rhinolophus sinicus	2017	This research		YN2017E
In	OK017610	China: Guangdong	Rhinolophus affinis	2017	This research		GD2017A
In	OK017611	China: Guangdong	Rhinolophus affinis	2017	This research		GD2017B
In	OK017612	China: Guangdong	Rhinolophus affinis	2017	This research		GD2017C
	OK017613	China: Guangdong	Rhinolophus affinis	2017	This research		GD2017D
In	OK017614	China: Guangdong	Rhinolophus affinis	2017	This research		GD2017E
In	OK017615	China: Guangxi	Rhinolophus luctus	2017	This research		GX2017B
In	OK017616	China: Guangxi	Rhinolophus rex	2017	This research		GX2017A
In	OK017617	China: Guangxi	Rhinolophus rex	2019	This research		GX2019B
	OK017618	China: Guangdong	Rhinolophus sinicus	2020	This research		GD2020A
	OK017619	China: Guangdong	Rhinolophus sinicus	2020	This research		GD2020B
	OK017620	China: Guangdong	Rhinolophus sinicus	2020	This research		GD2020C
	OK017621	China: Guangdong	Rhinolophus sinicus	2020	This research		GD2020D
	OK017622	China: Guangdong	Rhinolophus sinicus	2020	This research		GD2020E
	OK017623	China: Guangdong	Rhinolophus sinicus	2020	This research		GD2020F
	OK017624	China: Guangdong	Rhinolophus sinicus	2020	This research		GD2020G
	OK017625	China: Guangdong	Rhinolophus sinicus	2020	This research		GD2020H
	OK017626	China: Guangdong	Rhinolophus sinicus	2020	This research		GD2020I
	OK017627	China: Guangdong	Rhinolophus sinicus	2020	This research		GD2020J
	OK017628	China: Guangdong	Rhinolophus sinicus	2020	This research		GD2020K
	OK017629	China: Guangxi	Rhinolophus sinicus	2020	This research		GX2020
In	OK017630	China: Hubei	Rhinolophus ferrumequinum	2020	This research		HB2020A
In	OK017631	China: Hubei	Rhinolophus ferrumequinum	2020	This research		HB2020B
In	OK017632	China: Hubei	Rhinolophus ferrumequinum	2020	This research		HB2020C
	OK017633	China: Liaoning	Rhinolophus ferrumequinum	2020	This research		LN2020D
	OK017634	China: Liaoning	Rhinolophus ferrumequinum	2020	This research		LN2020I
In	OK017635	China: Guizhou	Rhinolophus sinicus	2021	This research		GZ2021A
In	OK017636	China: Guizhou	Rhinolophus sinicus	2021	This research		GZ2021B
	OK017637	China: Guizhou	Rhinolophus sinicus	2021	This research		GZ2021E
	OK017638	China: Guizhou	Rhinolophus sinicus	2021	This research		GZ2021F
	OK017639	China: Guizhou	Rhinolophus sinicus	2021	This research		GZ2021G
	OK017640	China: Guizhou	Rhinolophus affinis	2021	This research		GZ2021D
In	OK017641	China: Fujian	Rhinolophus sinicus	2021	This research		FJ2021B
	OK017642	China: Fujian	Rhinolophus sinicus	2021	This research		FJ2021F
	OK017643	China: Fujian	Rhinolophus sinicus	2021	This research		FJ2021G
	OK017644	China: Fujian	Rhinolophus sinicus	2021	This research		FJ2021H
	OK017645	China: Fujian	Rhinolophus sinicus	2021	This research		FJ2021I
	OK017646	China: Fujian	Rhinolophus sinicus	2021	This research		FJ2021J
	OK017647	China: Fujian	Rhinolophus sinicus	2021	This research		FJ2021K
	OK017648	China: Fujian	Rhinolophus sinicus	2021	This research		FJ2021L
	OK017649	China: Fujian	Rhinolophus sinicus	2021	This research		FJ2021N
In	OK017650	China: Fujian	Rhinolophus affinis	2021	This research		FJ2021C
	OK017651	China: Fujian	Rhinolophus affinis	2021	This research		FJ2021O
	OK017652	China: Jiangxi	Rhinolophus sinicus	2021	This research		JX2021A-b
	OK017653	China: Jiangxi	Rhinolophus sinicus	2021	This research		JX2021B
	OK017654	China: Jiangxi	Rhinolophus affinis	2021	This research		JX2021H
	OK017655	China: Jiangxi	Rhinolophus sinicus	2021	This research		JX2021E
	OK017656	China: Jiangxi	Rhinolophus sinicus	2021	This research		JX2021F
	OK017657	China: Jiangxi	Rhinolophus sinicus	2021	This research		JX2021I
	OK017658	China: Jiangxi	Rhinolophus sinicus	2021	This research		JX2021Q
	OK017659	China: Jiangxi	Rhinolophus sinicus	2021	This research		JX2021R
	OK017660	China: Jiangxi	Rhinolophus sinicus	2021	This research		JX2021S
	OK017661	China: Jiangxi	Rhinolophus sinicus	2021	This research		JX2021T
	OK017662	China: Jiangxi	Rhinolophus sinicus	2021	This research		JX2021U
	OK017663	China: Jiangxi	Rhinolophus sinicus	2021	This research		JX2021V
	OK017664	China: Jiangxi	Rhinolophus sinicus	2021	This research		JX2021W
	OK017665	China: Jiangxi	Rhinolophus sinicus	2021	This research		JX2021X
	OK017666	China: Jiangxi	Rhinolophus sinicus	2021	This research		JX2021Y
	OK017667	China: Jiangxi	Rhinolophus sinicus	2021	This research		JX2021Z
	OK017668	China: Anhui	Rhinolophus sinicus	2021	This research		AH2021B
	OK017669	China: Jiangxi	Rhinolophus sinicus	2021	This research		JX2021AA
	OK017670	China: Jiangxi	Rhinolophus sinicus	2021	This research		JX2021AB
In	OK017792	China: Guangdong	Rhinolophus affinis	2017	This research	Yes	GD2017F
In	OK017793	China: Yunnan	Rhinolophus affinis	2020	This research	Yes	YN2020A
	OK017794	China: Liaoning	Rhinolophus ferrumequinum	2020	This research	Yes	LN2020A
In	OK017795	China: Liaoning	Rhinolophus ferrumequinum	2020	This research	Yes	LN2020B
	OK017796	China: Liaoning	Rhinolophus ferrumequinum	2020	This research	Yes	LN2020C
	OK017797	China: Liaoning	Rhinolophus ferrumequinum	2020	This research	Yes	LN2020E
	OK017798	China: Liaoning	Rhinolophus ferrumequinum	2020	This research	Yes	LN2020F
In	OK017799	China: Liaoning	Rhinolophus ferrumequinum	2020	This research	Yes	LN2020G
In	OK017800	China: Liaoning	Rhinolophus ferrumequinum	2020	This research	Yes	LN2020H
In	OK017801	China: Hubei	Rhinolophus sp.	2020	This research	Yes	HB2020D
In	OK017802	China: Hubei	Rhinolophus sp.	2020	This research	Yes	HB2020E
In	OK017803	China: Hunan	Rhinolophus pusillus	2021	This research	Yes	HN2021A
In	OK017804	China: Hunan	Rhinolophus pusillus	2021	This research	Yes	HN2021B
In	OK017805	China: Hunan	Rhinolophus pusillus	2021	This research	Yes	HN2021G
In	OK017806	China: Yunnan	Rhinolophus pusillus	2021	This research	Yes	YN2021
	OK017807	China: Anhui	Rhinolophus sinicus	2021	This research	Yes	AH2021A
In	OK017808	China: Fujian	Rhinolophus sinicus	2021	This research	Yes	FJ2021A
	OK017809	China: Fujian	Rhinolophus sinicus	2021	This research	Yes	FJ2021D
	OK017810	China: Fujian	Rhinolophus sinicus	2021	This research	Yes	FJ2021E
In	OK017811	China: Fujian	Rhinolophus sinicus	2021	This research	Yes	FJ2021M
	OK017812	China: Guangdong	Rhinolophus sinicus	2016	This research	Yes	GD2016B
In	OK017813	China: Guangdong	Rhinolophus sinicus	2017	This research	Yes	GD2017G
	OK017814	China: Guangdong	Rhinolophus sinicus	2017	This research	Yes	GD2017H
	OK017815	China: Guangdong	Rhinolophus sinicus	2017	This research	Yes	GD2017I
	OK017816	China: Guangdong	Rhinolophus sinicus	2017	This research	Yes	GD2017J
	OK017817	China: Guangdong	Rhinolophus sinicus	2017	This research	Yes	GD2017K
	OK017818	China: Guangdong	Rhinolophus sinicus	2017	This research	Yes	GD2017L
In	OK017819	China: Guangdong	Rhinolophus sinicus	2017	This research	Yes	GD2017M
	OK017820	China: Guangdong	Rhinolophus sinicus	2017	This research	Yes	GD2017N
	OK017821	China: Guangdong	Rhinolophus sinicus	2017	This research	Yes	GD2017O
	OK017822	China: Guangdong	Rhinolophus sinicus	2017	This research	Yes	GD2017P
	OK017823	China: Guangdong	Rhinolophus sinicus	2017	This research	Yes	GD2017Q
	OK017824	China: Guangdong	Rhinolophus sinicus	2017	This research	Yes	GD2017W
	OK017825	China: Guangdong	Rhinolophus sinicus	2019	This research	Yes	GD2019A
	OK017826	China: Guangdong	Rhinolophus sinicus	2019	This research	Yes	GD2019B
In	OK017827	China: Guangdong	Rhinolophus sinicus	2019	This research	Yes	GD2019D
In	OK017828	China: Guangdong	Rhinolophus sinicus	2019	This research	Yes	GD2019E
	OK017829	China: Guizhou	Rhinolophus sinicus	2021	This research	Yes	GZ2021C
	OK017830	China: Guizhou	Rhinolophus sinicus	2021	This research	Yes	GZ2021H
In	OK017831	China: Guizhou	Rhinolophus sinicus	2021	This research	Yes	GZ2021I
In	OK017832	China: Hunan	Rhinolophus sinicus	2021	This research	Yes	HN2021C
In	OK017833	China: Hunan	Rhinolophus sinicus	2021	This research	Yes	HN2021D
In	OK017834	China: Hunan	Rhinolophus sinicus	2021	This research	Yes	HN2021E
In	OK017835	China: Hunan	Rhinolophus sinicus	2021	This research	Yes	HN2021F
	OK017836	China: Jiangxi	Rhinolophus sinicus	2021	This research	Yes	JX2021AC
	OK017837	China: Jiangxi	Rhinolophus sinicus	2021	This research	Yes	JX2021C
	OK017838	China: Jiangxi	Rhinolophus sinicus	2021	This research	Yes	JX2021G
	OK017839	China: Jiangxi	Rhinolophus sinicus	2021	This research	Yes	JX2021J
	OK017840	China: Jiangxi	Rhinolophus sinicus	2021	This research	Yes	JX2021K
	OK017841	China: Jiangxi	Rhinolophus sinicus	2021	This research	Yes	JX2021L
	OK017842	China: Jiangxi	Rhinolophus sinicus	2021	This research	Yes	JX2021M
	OK017843	China: Jiangxi	Rhinolophus sinicus	2021	This research	Yes	JX2021N
	OK017844	China: Jiangxi	Rhinolophus sinicus	2021	This research	Yes	JX2021O
	OK017845	China: Jiangxi	Rhinolophus sinicus	2021	This research	Yes	JX2021P
In	OK017846	China: Sichuan	Rhinolophus sinicus	2016	This research	Yes	SC2018B
In	OK017847	China: Yunnan	Rhinolophus sinicus	2016	This research	Yes	YN2016A
	OK017848	China: Yunnan	Rhinolophus sinicus	2016	This research	Yes	YN2016B
	OK017849	China: Yunnan	Rhinolophus sinicus	2016	This research	Yes	YN2016C
In	OK017850	China: Yunnan	Rhinolophus sinicus	2016	This research	Yes	YN2016D
In	OK017851	China: Yunnan	Rhinolophus sinicus	2016	This research	Yes	YN2016E
In	OK017852	China: Yunnan	Rhinolophus sinicus	2020	This research	Yes	YN2020B
	OK017853	China: Yunnan	Rhinolophus sinicus	2020	This research	Yes	YN2020C
	OK017854	China: Yunnan	Rhinolophus sinicus	2020	This research	Yes	YN2020D
	OK017855	China: Yunnan	Rhinolophus sinicus	2020	This research	Yes	YN2020E
	OK017856	China: Yunnan	Rhinolophus sinicus	2020	This research	Yes	YN2020F
	OK017857	China: Yunnan	Rhinolophus sinicus	2020	This research	Yes	YN2020G
	OK017858	China: Yunnan	Rhinolophus sinicus	2020	This research	Yes	YN2020H
In	OK017859	China: Guangxi	Rhinolophus siamensis	2019	This research	Yes	GX2019A
	OK017860	China: Jiangxi	Rhinolophus siamensis	2021	This research	Yes	JX2021D

## Sheet: Table S2
Table S2 Province and Sample Size
Species	Anhui	Chongqing	Fujian	Guangdong	Guangxi	Guizhou	Hainan	Hubei	Hunan	Jiangxi	Liaoning	Sichuan	Yunnan	Zhejiang	Total
Rhinolophus sinicus	24	6	86	267	75	113	20	306	98	122		48	228	22	1415
Rhinolophus pusillus	1	10	12	65	291	33	5	204	64	3		100	72	206	1066
Scotophilus kuhlii				276	525		244								1045
Tylonycteris pachypus				343	585								86		1014
Hipposideros larvatus				263	495		74						126		958
Rhinolophus affinis	9	10	51	224	88	16	51	20	26	18		58	109		680
Hipposideros armiger		12		210	129	1	4					94	152		602
Pipistrellus abramus				186	36	19	24			212				85	562
Myotis chinensis				59	4							48	393		504
Myotis ricketti				291	18		2			11		82	89		493
Rhinolophus ferrumequinum								32		1	168		22	221	444
Miniopterus schreibersii				72		3	8	18				168	122		391
Rhinolophus pearsonii	2		4	80	7	86		18	42	2		8	68	9	326
Taphozous melanopogon					294		20								314
Aselliscus stoliczkanus					32								274		306
Myotis altarium		26		4	1	2		60				126	5		224
Eonycteris spelaea							1						219		220
Hipposideros pomona				35	60		47						61		203
Myotis siligorensis				2	184								10		196
Tylonycteris robustula				92	17	40							38		187
Hipposideros pratti				30	53			12				60	30		185
Myotis daubentonii				96	38						30		2		166
Rhinolophus macrotis			1	3	42	20			28	3		14	58		169
Miniopterus pusillus				138			18						6		162
Pipistrellus pipistrellus				48	26		48			3			5		130
Myotis spp.				28	9	4					4	80	2	1	128
Cynopterus sphinx					92		2						2		96
Myotis adversus				7						83					90
Pipistrellus spp.				30	4	1							47		82
Rousettus leschenaulti				5	11		1						64		81
Myotis laniger				46	6	12				6				10	80
Chaerephon plicata													76		76
Eptesicus serotinus					37					34					71
Rhinolophus malayanus													52		52
Hipposideros cineraceus					48										48
Rhinolophus siamensis			5	5	6				26	2			2		46
Myotis longipes				16	14								2	5	37
Ia io													23	4	27
Rhinolophus rex				7	10	2			2			6			27
Scotophilus heathi				1			18						5		24
Megaderma spasma													19		19
Rhinolophus marshalli					19										19
Rhinolophus luctus				7		2		2					2		13
Myotis fimbriatus				4						3			5		12
Rhinolophus spp.			1										8	2	11
Myotis montivagus				9											9
Pipistrellus tenuis				9											9
Nyctalus velutinus				3						5					8
Hypsugo pulveratus				7											7
Megaderma lyra				7											7
Myotis indochinensis				6									1		7
Hypsugo cadornae				6											6
Murina spp.				3		1									4
Rhinolophus paradoxolophus													2		2
Myotis formosus			1												1
Myotis nipalensis				1											1
Myotis rufoniger						1									1
Pipistrellus ceylonicus					1										1
Total	36	64	161	2991	3257	356	587	672	286	508	202	892	2487	565	13064

## Sheet: Table S3
Table S3 Information of pools, Coronavirus positive (199/372), Alphacoronavirus 113, Betacoronavirus 64, both alpha-&beta-coronavirus 22
Pool	Species	Province	Year	Coronavirus Positive	Alphacoronavirus	Alphacoronavirus Subgenus	Betacoronavirus	Betacoronavirus Subgenus
pool-001	Rhinolophus sinicus	SC	2018	+			+	Sarbecovirus
pool-002	Rhinolophus affinis	SC	2018
pool-003	Rhinolophus sp.	SC	2018
pool-004	Myotis chinensis	SC	2018
pool-005	Myotis ricketti	SC	2018
pool-006	Hipposideros armiger	SC	2018
pool-007	Rhinolophus pusillus	SC	2018
pool-008	Myotis altarium	SC	2018
pool-009	Myotis altarium	SC	2018
pool-010	Miniopterus schreibersii	SC	2018	+	+	Minunacovirus
pool-011	Miniopterus schreibersii	SC	2018
pool-012	Myotis altarium	CQ	2018
pool-013	Rhinolophus sp.	CQ	2018
pool-014	Hipposideros armiger	CQ	2018
pool-015	Rhinolophus siamensis	HB	2020
pool-016	Rhinolophus siamensis	HB	2020
pool-017	Rhinolophus Mix	HB	2020
pool-018	Rhinolophus Mix	HB	2020	+			+	Sarbecovirus
pool-019	Rhinolophus Mix	HB	2020
pool-020	Rhinolophus Mix	HB	2020	+			+	Sarbecovirus
pool-021	Rhinolophus sinicus	HB	2020	+			+	Sarbecovirus
pool-022	Rhinolophus sinicus	HB	2020	+	+	Decacovirus
pool-023	Myotis altarium	HB	2020
pool-024	Scotophilus kuhlii	GX	2018	+	+	Pedacovirus
pool-025	Scotophilus kuhlii	GX	2018	+	+	Pedacovirus
pool-026	Cynopterus sphinx	GX	2018
pool-027	Hipposideros pomona	GX	2018
pool-028	Hipposideros armiger	GX	2018
pool-029	Scotophilus kuhlii	HI	2018	+	+	Pedacovirus
pool-030	Scotophilus kuhlii	HI	2018	+	+	Pedacovirus
pool-031	Scotophilus kuhlii	HI	2018	+	+	Pedacovirus
pool-032	Scotophilus kuhlii	HI	2018	+	+	Pedacovirus
pool-033	Scotophilus kuhlii	HI	2018	+	+	Pedacovirus
pool-034	Scotophilus kuhlii	HI	2018	+	+	Pedacovirus
pool-035	Scotophilus kuhlii	HI	2018	+	+	Pedacovirus
pool-036	Hipposideros pomona	HI	2018	+	+	Decacovirus
pool-037	Pipistrellus abramus	HI	2018	+			+	Merbecovirus
pool-038	Pipistrellus abramus	HI	2018
pool-039	Pipistrellus abramus	HI	2018
pool-040	Scotophilus heathi	HI	2018	+	+	Pedacovirus
pool-041	Pipistrellus abramus	HI	2018
pool-042	Rhinolophus affinis	YN	2020
pool-043	Miniopterus schreibersii	YN	2020	+	+	Minunacovirus
pool-044	Miniopterus schreibersii	YN	2020	+	+	Minunacovirus
pool-045	Rhinolophus sinicus	YN	2020
pool-046	Rhinolophus sinicus	YN	2020
pool-047	Rhinolophus sinicus	YN	2020
pool-048	Rhinolophus sinicus	YN	2020
pool-049	Rhinolophus sinicus	YN	2020
pool-050	Eonycteris spelaea	YN	2020	+			+	Nobecovirus
pool-051	Eonycteris spelaea	YN	2020	+			+	Nobecovirus
pool-052	Aselliscus stoliczkanus	YN	2020
pool-053	Chaerephon plicata	YN	2020	+	+	Decacovirus
pool-054	Hipposideros armiger	YN	2020
pool-055	Hipposideros larvatus	YN	2020
pool-056	Hipposideros larvatus	YN	2020	+	+	Decacovirus
pool-057	Rhinolophus affinis	YN	2020	+	+	Rhinacovirus
pool-058	Hipposideros pratti	YN	2020
pool-059	Pipistrellus sp.	YN	2020
pool-060	Rhinolophus sinicus	YN	2020	+	+	Rhinacovirus	+	Sarbecovirus
pool-061	Miniopterus schreibersii	YN & GX	2020	+	+	Minunacovirus
pool-062	Hipposideros pomona	YN	2020	+	+	Decacovirus
pool-063	Myotis ricketti	YN	2020	+	+	Pedacovirus
pool-064	Myotis chinensis	YN	2020	+	+	Pedacovirus
pool-065	Rousettus leschenaultii	YN	2020
pool-066	Rhinolophus sp.	YN	2020
pool-067	Hipposideros sp.	GX	2020
pool-068	Aselliscus stoliczkanus	GX	2020
pool-069	Myotis sp.	GX & YN	2020
pool-070	Rhinolophus sinicus	YN	2020
pool-071	Hipposideros larvatus	GX	2020
pool-072	Hipposideros larvatus	GX	2020
pool-073	Bat Mix	-	2020
pool-074	Rhinolophus pusillus	GD	2016
pool-075	Rhinolophus pusillus	GD	2017
pool-076	Rhinolophus pusillus	GX	2016	+	+	Decacovirus
pool-077	Rhinolophus pusillus	GX	2016	+	+	Decacovirus
pool-078	Rhinolophus pusillus	GX	2016
pool-079	Rhinolophus pusillus	GX	2016
pool-080	Rhinolophus pusillus	GX	2017	+	+	Rhinacovirus
pool-081	Rhinolophus pusillus	GX	2017	+	+	Rhinacovirus
pool-082	Rhinolophus sinicus	GD	2016
pool-083	Rhinolophus sinicus	GD	2016	+			+	Sarbecovirus
pool-084	Rhinolophus sinicus	GD	2016	+			+	Sarbecovirus
pool-085	Rhinolophus sinicus	GD	2017	+	+	Pedacovirus
pool-086	Rhinolophus sinicus	GD	2017	+	+	Rhinacovirus	+	Sarbecovirus
pool-087	Rhinolophus sinicus	GD	2017	+	+	Rhinacovirus	+	Sarbecovirus
pool-088	Rhinolophus sinicus	GD	2017	+	+	Rhinacovirus	+	Sarbecovirus
pool-089	Rhinolophus sinicus	GD	2019	+			+	Sarbecovirus
pool-090	Rhinolophus sinicus	GD	2018	+			+	Sarbecovirus
pool-091	Rhinolophus sinicus	GX	2016	+	+	Rhinacovirus
pool-092	Rhinolophus sinicus	HI	2019	+	+	Rhinacovirus
pool-093	Rhinolophus sinicus	YN	2016	+			+	Sarbecovirus
pool-094	Rhinolophus sinicus	YN	2016	+	+	Decacovirus	+	Sarbecovirus
pool-095	Rhinolophus affinis	GD	2016	+	+	Rhinacovirus
pool-096	Rhinolophus affinis	GD	2017	+	+	Rhinacovirus	+	Sarbecovirus
pool-097	Rhinolophus affinis	GD	2017	+	+	Rhinacovirus	+	Sarbecovirus
pool-098	Rhinolophus affinis	GD	2017	+	+	Rhinacovirus
pool-099	Rhinolophus affinis	GD	2018
pool-100	Rhinolophus affinis	GD	2019	+	+	Rhinacovirus
pool-101	Rhinolophus affinis	GD	2020	+	+	Rhinacovirus
pool-102	Rhinolophus affinis	GX	2017	+	+	Rhinacovirus
pool-103	Rhinolophus affinis	GX	2019
pool-104	Rhinolophus affinis	GX	2019
pool-105	Rhinolophus affinis	HI	2019	+	+	Rhinacovirus
pool-106	Rhinolophus affinis	HI	2019	+	+	Rhinacovirus
pool-107	Rhinolophus affinis	YN	2016	+	+	Rhinacovirus
pool-108	Rhinolophus marshalli	GX	2017
pool-109	Rhinolophus pearsonii	GD	2016
pool-110	Rhinolophus pearsonii	GD	2017
pool-111	Rhinolophus pearsonii	GD	2019	+	+	Rhinacovirus
pool-112	Rhinolophus sp.	-	2016	+	+	Rhinacovirus	+	Sarbecovirus
pool-113	Rhinolophus macrotis	GX	2017
pool-114	Rhinolophus macrotis	GX	2017
pool-115	Rhinolophus pusillus	-	2016	+	+	Decacovirus
pool-116	Rhinolophus pusillus	GD	2020	+	+	Rhinacovirus
pool-117	Rhinolophus pearsonii	GD	2020
pool-118	Rhinolophus sinicus	GD	2020	+			+	Sarbecovirus
pool-119	Rhinolophus sinicus	GD	2020	+			+	Sarbecovirus
pool-120	Rhinolophus affinis	GD	2020	+	+	Rhinacovirus
pool-121	Rhinolophus luctus & sp.	GD	2020
pool-122	Rhinolophus pusillus	GD	2020	+	+	Rhinacovirus
pool-123	Rhinolophus sinicus	GX	2020	+			+	Sarbecovirus
pool-124	Tylonycteris pachypus	GD	2016
pool-125	Tylonycteris pachypus	GD	2016	+	+	Rhinacovirus
pool-126	Tylonycteris pachypus	GD	2016
pool-127	Tylonycteris pachypus	GD	2016	+			+	Merbecovirus
pool-128	Tylonycteris pachypus	GD	2016
pool-129	Tylonycteris pachypus	GD	2016	+	+	Rhinacovirus
pool-130	Tylonycteris pachypus	GD	2017	+			+	Merbecovirus
pool-131	Tylonycteris pachypus	GD	2017
pool-132	Tylonycteris pachypus	GD	2017	+			+	Merbecovirus
pool-133	Tylonycteris pachypus	GD	2018	+			+	Merbecovirus
pool-134	Tylonycteris pachypus	GD	2019
pool-135	Tylonycteris pachypus	GD	2019	+			+	Merbecovirus
pool-136	Tylonycteris pachypus	GX	2016	+			+	Merbecovirus
pool-137	Tylonycteris pachypus	GX	2016	+			+	Merbecovirus
pool-138	Tylonycteris pachypus	GX	2016	+			+	Merbecovirus
pool-139	Tylonycteris pachypus	GX	2016	+			+	Merbecovirus
pool-140	Tylonycteris pachypus	GX	2016	+			+	Merbecovirus
pool-141	Tylonycteris pachypus	GX	2016	+			+	Merbecovirus
pool-142	Tylonycteris pachypus	GX	2017
pool-143	Tylonycteris pachypus	GX	2017	+			+	Merbecovirus
pool-144	Tylonycteris pachypus	GX	2017	+			+	Merbecovirus
pool-145	Tylonycteris pachypus	GX	2019
pool-146	Tylonycteris pachypus	GX	2019
pool-147	Tylonycteris pachypus	GX	2019
pool-148	Tylonycteris pachypus	GX	2019	+			+	Merbecovirus
pool-149	Tylonycteris pachypus	GX	2019
pool-150	Tylonycteris pachypus	YN	2016	+			+	Merbecovirus
pool-151	Tylonycteris pachypus	YN	2016
pool-152	Tylonycteris pachypus	YN	2016
pool-153	Pipistrellus abramus	GD	2016	+			+	Merbecovirus
pool-154	Pipistrellus abramus	GD	2017	+			+	Merbecovirus
pool-155	Pipistrellus abramus	GD	2017	+			+	Merbecovirus
pool-156	Pipistrellus abramus	GD	2018	+			+	Merbecovirus
pool-157	Pipistrellus abramus	GD	2019
pool-158	Pipistrellus abramus	GD	2019
pool-159	Pipistrellus abramus	GX	2017	+	+	unclassified Alphacoronavirus
pool-160	Pipistrellus abramus	GZ	2019	+	+	unclassified Alphacoronavirus
pool-161	Pipistrellus abramus	JX	2020	+			+	Merbecovirus
pool-162	Pipistrellus abramus	JX	2020	+			+	Merbecovirus
pool-163	Pipistrellus abramus	JX	2020	+			+	Merbecovirus
pool-164	Pipistrellus abramus	JX	2020	+			+	Merbecovirus
pool-165	Pipistrellus abramus	JX	2020	+			+	Merbecovirus
pool-166	Pipistrellus abramus	JX	2020	+			+	Merbecovirus
pool-167	Pipistrellus abramus	JX	2020	+			+	Merbecovirus
pool-168	Pipistrellus abramus	ZJ	2020	+			+	Merbecovirus
pool-169	Pipistrellus abramus	ZJ	2020
pool-170	Pipistrellus abramus	ZJ	2020
pool-171	Scotophilus kuhlii	GD	2017	+	+	Pedacovirus
pool-172	Scotophilus kuhlii	GD	2017	+	+	Pedacovirus
pool-173	Scotophilus kuhlii	GD	2017
pool-174	Scotophilus kuhlii	GD	2018	+	+	Pedacovirus
pool-175	Scotophilus kuhlii	GD	2018	+	+	Pedacovirus
pool-176	Scotophilus kuhlii	GD	2018	+	+	Pedacovirus
pool-177	Scotophilus kuhlii	GD	2018	+	+	Pedacovirus
pool-178	Scotophilus kuhlii	GD	2018	+	+	Pedacovirus
pool-179	Scotophilus kuhlii	GD	2019
pool-180	Scotophilus kuhlii	GX	2017	+	+	Pedacovirus
pool-181	Scotophilus kuhlii	GD	2019
pool-182	Scotophilus kuhlii	GX	2017
pool-183	Scotophilus kuhlii	GX	2017
pool-184	Scotophilus kuhlii	GX	2017	+	+	Pedacovirus
pool-185	Scotophilus kuhlii	GX	2017	+	+	Pedacovirus
pool-186	Scotophilus kuhlii	GX	2017	+	+	Pedacovirus
pool-187	Hipposideros larvatus	GD	2016
pool-188	Hipposideros larvatus	GD	2016
pool-189	Hipposideros larvatus	GD	2016
pool-190	Hipposideros larvatus	GD	2017
pool-191	Hipposideros larvatus	GD	2017
pool-192	Hipposideros larvatus	GD	2018
pool-193	Hipposideros larvatus	GD	2018
pool-194	Hipposideros larvatus	GD	2019	+	+	Rhinacovirus
pool-195	Hipposideros larvatus	GD	2019	+	+	Rhinacovirus
pool-196	Hipposideros larvatus	GX	2016	+	+	Rhinacovirus
pool-197	Hipposideros larvatus	GX	2017
pool-198	Hipposideros larvatus	GX	2017
pool-199	Hipposideros larvatus	GX	2017
pool-200	Hipposideros larvatus	GX	2017
pool-201	Hipposideros larvatus	GX	2017
pool-202	Hipposideros larvatus	GX	2017
pool-203	Hipposideros larvatus	HI	2019
pool-204	Hipposideros larvatus	HI	2019	+	+	Rhinacovirus
pool-205	Myotis ricketti	GD	2016
pool-206	Myotis ricketti	GD	2017	+	+	Pedacovirus
pool-207	Myotis ricketti	GD	2017	+	+	Pedacovirus
pool-208	Myotis ricketti	GD	2017
pool-209	Myotis ricketti	GD	2017	+			+	Merbecovirus
pool-210	Myotis ricketti	GD	2017	+	+	Rhinacovirus
pool-211	Myotis ricketti	GD	2017	+	+	Pedacovirus
pool-212	Myotis ricketti	GD	2019	+	+	Pedacovirus
pool-213	Myotis ricketti	GD	2019	+	+	Rhinacovirus
pool-214	Myotis ricketti	GD	2019	+	+	Rhinacovirus
pool-215	Myotis ricketti	GD	2020	+	+	Pedacovirus
pool-216	Myotis ricketti	GX	2017	+	+	Pedacovirus
pool-217	Myotis ricketti	JX	2020	+	+	Pedacovirus
pool-218	Myotis ricketti	YN	2016	+	+	Pedacovirus
pool-219	Myotis ricketti	YN	2017	+			+	Merbecovirus
pool-220	Hipposideros armiger	GD	2016	+			+	Merbecovirus
pool-221	Hipposideros armiger	GD	2017	+			+	Merbecovirus
pool-222	Hipposideros armiger	GD	2017	+	+	Rhinacovirus
pool-223	Hipposideros armiger	GD	2018	+	+	Rhinacovirus
pool-224	Hipposideros armiger	GD	2019
pool-225	Hipposideros armiger	GD	2020
pool-226	Hipposideros armiger	YN	2016	+	+	Rhinacovirus
pool-227	Hipposideros armiger	YN	2016	+	+	Rhinacovirus
pool-228	Miniopterus pusillus	GD	2016	+	+	Minunacovirus
pool-229	Miniopterus pusillus	GD	2016	+	+	Minunacovirus
pool-230	Miniopterus pusillus	GD	2016	+	+	Minunacovirus
pool-231	Miniopterus pusillus	GD	2017	+	+	Minunacovirus
pool-232	Miniopterus pusillus	GD	2017	+	+	Minunacovirus
pool-233	Miniopterus pusillus	HI	2019	+	+	Minunacovirus
pool-234	Tylonycteris robustula	GD	2016
pool-235	Tylonycteris robustula	GD	2017
pool-236	Tylonycteris robustula	GD	2017
pool-237	Tylonycteris robustula	GD	2018
pool-238	Tylonycteris robustula	GX	2016	+	+	Rhinacovirus
pool-239	Tylonycteris robustula	GZ	2019
pool-240	Tylonycteris robustula	YN	2016
pool-241	Taphozous melanopogon	GX	2016
pool-242	Taphozous melanopogon	GX	2017
pool-243	Taphozous melanopogon	GX	2017
pool-244	Taphozous melanopogon	GX	2017
pool-245	Taphozous melanopogon	HI	2019
pool-246	Hipposideros pomona	GD	2016	+	+	Rhinacovirus
pool-247	Hipposideros pomona	GX	2016	+	+	Decacovirus
pool-248	Hipposideros pomona	HI	2019	+	+	Decacovirus
pool-249	Myotis chinensis	-	2016
pool-250	Eonycteris spelaea	YN	2016	+			+	Nobecovirus
pool-251	Eonycteris spelaea	YN	2017	+			+	Nobecovirus
pool-252	Eonycteris spelaea	YN	2017	+			+	Nobecovirus
pool-253	Eonycteris spelaea	YN	2017	+			+	Nobecovirus
pool-254	Myotis siligorensis	GX	2016	+			+	Merbecovirus
pool-255	Myotis siligorensis	GX	2016	+	+	Pedacovirus
pool-256	Myotis siligorensis	GX	2017	+	+	Pedacovirus
pool-257	Myotis siligorensis	GX	2017	+	+	Pedacovirus
pool-258	Aselliscus stoliczkanus	YN	2016
pool-259	Aselliscus stoliczkanus	YN	2017
pool-260	Aselliscus stoliczkanus	YN	2017
pool-261	Aselliscus stoliczkanus	YN	2017
pool-262	Myotis adversus	GD	2016
pool-263	Myotis adversus	JX	2020	+	+	Pedacovirus
pool-264	Myotis adversus	JX	2020
pool-265	Myotis adversus	JX	2020
pool-266	Rousettus leschenaultii	-	2016
pool-267	Rousettus leschenaultii	YN	2016	+			+	Nobecovirus
pool-268	Rousettus leschenaultii	YN	2017	+			+	Merbecovirus
pool-269	Pipistrellus abramus	GD	2016	+	+	unclassified Alphacoronavirus
pool-270	Pipistrellus abramus	GD	2017
pool-271	Pipistrellus abramus	GX	2017	+	+	unclassified Alphacoronavirus
pool-272	Pipistrellus abramus	JX	2020
pool-273	Miniopterus schreibersii	GD	2016	+	+	Minunacovirus
pool-274	Miniopterus schreibersii	GD	2016
pool-275	Miniopterus schreibersii	HI	2019
pool-276	Myotis laniger	GD	2017
pool-277	Myotis laniger	-	2020
pool-278	Myotis chinensis	GD	2016	+	+	Pedacovirus
pool-279	Myotis chinensis	GD	2017	+	+	Pedacovirus
pool-280	Myotis chinensis	-	2016
pool-281	Taphozous sp.	GX	2016
pool-282	Hipposideros armiger	JX	2020	+			+	Merbecovirus
pool-283	Megaderma lyra	-	2017	+	+	Pedacovirus
pool-284	Miniopterus schreibersii	GD	2016	+	+	Minunacovirus
pool-285	Hipposideros pratti	GD	2016
pool-286	Pipistrellus sp.	GD	2019
pool-287	Myotis longipes	-	2017	+	+	Pedacovirus
pool-288	Myotis fimbriatus	GD	2016
pool-289	Io la	YN	2016
pool-290	Myotis sp.	-	2017
pool-291	Nyctalus velutinus	-	2016
pool-292	Chaerephon plicata	YN	2016
pool-293	Scotophilus heathi	-	2016	+	+	Pedacovirus
pool-294	Rhinolophus pusillus	ZJ	2020	+	+	Rhinacovirus
pool-295	Rhinolophus pusillus	ZJ	2020
pool-296	Rhinolophus pusillus	ZJ	2020	+	+	Rhinacovirus
pool-297	Rhinolophus pusillus	ZJ	2020	+	+	Rhinacovirus
pool-298	Rhinolophus ferrumequinum	ZJ	2020
pool-299	Rhinolophus ferrumequinum	ZJ	2020
pool-300	Rhinolophus ferrumequinum	ZJ	2020	+	+	Decacovirus
pool-301	Rhinolophus ferrumequinum	ZJ	2020	+	+	Decacovirus
pool-302	Rhinolophus pusillus	HB	2020	+	+	Rhinacovirus
pool-303	Rhinolophus ferrumequinum	HB	2020	+	+	Decacovirus	+	Sarbecovirus
pool-304	Rhinolophus sinicus	HB	2020
pool-305	Rhinolophus sinicus	HB	2020
pool-306	Rhinolophus sinicus	HB	2020
pool-307	Rhinolophus affinis	HB	2020
pool-308	Aselliscus stoliczkanus	-	2020
pool-309	Rhinolophus malayanus	YN	2020	+	+	Rhinacovirus
pool-310	Rhinolophus sp.	-	2020	+			+	Sarbecovirus
pool-311	Rhinolophus sp.	-	2020	+	+	Decacovirus
pool-312	Hipposideros sp.	-	2020
pool-313	Bat Mix	-	2020
pool-314	Rhinolophus macrotis	YN	2020
pool-315	Hipposideros armiger	YN	2020
pool-316	Rhinolophus pusillus	YN	2020	+	+	Rhinacovirus
pool-317	Rhinolophus malayanus	YN	2020
pool-318	Rhinolophus ferrumequinum	YN	2020
pool-319	Io la	YN	2020
pool-320	Rhinolophus pearsonii	YN	2020
pool-321	Miniopterus schreibersii	YN	2020	+	+	Minunacovirus
pool-322	Aselliscus stoliczkanus	YN	2020
pool-323	Aselliscus stoliczkanus	YN	2020
pool-324	Rhinolophus sinicus	YN	2020
pool-325	Myotis chinensis	YN	2020
pool-326	Rhinolophus luctus	YN	2020
pool-327	Rhinolophus ferrumequinum	LN	2020	+			+	Sarbecovirus
pool-328	Rhinolophus ferrumequinum	LN	2020	+			+	Sarbecovirus
pool-329	Rhinolophus ferrumequinum	LN	2020	+			+	Sarbecovirus
pool-330	Rhinolophus ferrumequinum	LN	2020	+			+	Sarbecovirus
pool-331	Myotis sp.	LN	2020
pool-332	Rhinolophus macrotis	HN	2021
pool-333	Rhinolophus pusillus	HN	2021	+			+	Sarbecovirus
pool-334	Rhinolophus pearsonii	HN	2021
pool-335	Rhinolophus siamensis	HN	2021
pool-336	Rhinolophus sinicus	HN	2021	+	+	Rhinacovirus	+	Sarbecovirus
pool-337	Rhinolophus affinis	HN	2021
pool-338	Rhinolophus macrotis	GZ	2021
pool-339	Rhinolophus pearsonii	GZ	2021
pool-340	Rhinolophus sinicus	GZ	2021	+			+	Sarbecovirus
pool-341	Rhinolophus affinis	GZ	2021	+			+	Sarbecovirus
pool-342	Hipposideros pomona	YN	2021
pool-343	Rhinolophus malayanus	YN	2021	+	+	Rhinacovirus
pool-344	Miniopterus schreibersii	YN	2021
pool-345	Myotis altarium	YN	2021
pool-346	Rhinolophus sp.	YN	2021	+	+	Rhinacovirus
pool-347	Rhinolophus sinicus & affinis	YN	2021
pool-348	Cynopterus sphinx	YN	2021
pool-349	Aselliscus stoliczkanus	YN	2021	+	+	Decacovirus
pool-350	Rhinolophus pusillus	YN	2021	+			+	Sarbecovirus
pool-351	Kerivoula hardwickii	FJ	2021
pool-352	Rhinolophus mix	FJ & ZJ	2021
pool-353	Rhinolophus pusillus	FJ	2021
pool-354	Rhinolophus pusillus	ZJ	2021
pool-355	Rhinolophus pearsonii	ZJ	2021
pool-356	Rhinolophus sinicus	FJ	2021	+	+	Rhinacovirus	+	Sarbecovirus
pool-357	Rhinolophus sinicus	FJ	2021	+	+	Rhinacovirus	+	Sarbecovirus
pool-358	Rhinolophus sinicus	FJ	2021	+	+	Rhinacovirus	+	Sarbecovirus
pool-359	Rhinolophus sinicus	ZJ	2021	+	+	Rhinacovirus
pool-360	Rhinolophus affinis	FJ	2021	+	+	Rhinacovirus	+	Sarbecovirus
pool-361	Rhinolophus affinis	FJ	2021	+	+	Rhinacovirus	+	Sarbecovirus
pool-362	Rhinolophus siamensis	FJ	2021
pool-363	Rhinolophus pusillus	JX&AH	2021
pool-364	Rhinolophus sinicus	JX	2021	+	+	Rhinacovirus	+	Sarbecovirus
pool-365	Rhinolophus mix	JX&AH	2021	+	+	unclassified Alphacoronavirus	+	Sarbecovirus
pool-366	Rhinolophus affinis	JX	2021	+	+	Rhinacovirus	+	Sarbecovirus
pool-367	Rhinolophus sinicus	JX	2021	+			+	Sarbecovirus
pool-368	Rhinolophus sinicus	JX	2021	+	+	Decacovirus	+	Sarbecovirus
pool-369	Rhinolophus sinicus	JX	2021	+	+	Rhinacovirus	+	Sarbecovirus
pool-370	Rhinolophus sinicus	JX	2021	+	+	Rhinacovirus	+	Sarbecovirus
pool-372	Rhinolophus sinicus	JX	2021	+	+	Rhinacovirus	+	Sarbecovirus

## Sheet: Table S4
Table S4 Homology alignment of SARS-COV as query
Strain	Genome	nsp1	nsp2	nsp3	nsp4	nsp5	nsp6	nsp7	nsp8	nsp9	nsp10	nsp12	nsp13	nsp14	nsp15	nsp16	S	orf3a	E	M	orf6	orf7a	orf7b	N
CN_AH2021B_R.sinicus	87.6	94.6	86.3	86.6	88.8	89.9	90.3	92.8	92.8	92.9	91.8	91.8	90.3	90.1	89.9	90.5	76.2	82.8	97.4	94.5	95.5	94.1	92.6	96.3
CN_Anlong-103_R.sinicus_(KY770858)	93.7	97.8	96.3	95.6	94.5	97.3	97.9	96	98	98.5	96.9	98.3	96.2	96	93	94.1	77.8	90.5	100	97.3	97.6	94.4	94.8	97.6
CN_F46_R.pusillus_(KU973692)	91.3	92.2	87	91.5	95.1	93.9	97.2	95.2	99	97.6	97.6	97.9	98	95.6	93.3	93.4	74.5	88.1	98.7	96.9	97.6	94.7	94.8	98
CN_FJ2021D_R.sinicus	87.7	95.2	86.1	86.2	89	90.2	91.4	93.2	92.8	90.3	92.8	92.3	90.5	90.4	89.9	90.4	76.2	84	97	94.6	95.5	92.3	93.3	96.6
CN_GD2016B_R.sinicus	89.1	94.4	86.3	87.2	90.1	96.4	97.9	93.2	96.8	96.8	96.4	92.6	90.6	91.4	93.2	93.5	76.4	83.7	96.1	94.2	94.7	93.6	93.3	96.9
CN_GD2017F_R.affinis	92.4	97.4	95.7	94.1	93.3	97.1	97.8	94.8	97.8	99.1	96.6	97.8	96	95.4	92.9	93.4	76.9	89.6	96.5	95.5	95.1	92.8	94.8	96.9
CN_GD2017H_R.sinicus	89.7	93.3	86.2	87.2	89.7	96.1	97.8	96	98.3	96.2	94.7	96.7	96.3	95.3	93.2	93.5	76.6	83.6	96.5	94.2	94.7	92.3	92.6	96.2
CN_GD2017Q_R.sinicus	89.5	94.1	89.2	88.3	90.7	92.7	94.3	94	95.3	95.6	94.7	94.5	92.2	92.8	91.8	89.9	76.7	82.7	97	94	95.1	93.3	93.3	96.9
CN_GD2019A_R.sinicus	90.2	93.3	91.3	88.5	93.4	96.6	97.8	95.6	99.3	96.8	95.4	94	93.3	95.5	92.1	92.5	76.5	83.7	97	94.3	95.1	94.1	94.1	97.3
CN_GX2013_R.sinicus_(KJ473815)	91.7	93.5	88.1	93.3	93	97.4	97.6	96.8	98.5	96.8	97.8	97.5	96.3	95.4	93.1	92.9	77.1	83.5	98.7	95.4	97.6	93.3	94.8	97.2
CN_GX2019A_R.siamensis	89.5	93.9	85.7	86	89.9	96.2	97.7	97.6	98.7	96.8	95.9	96.6	93.3	95.4	93.3	92.5	75.3	87.3	97.8	96.4	95.1	93.6	91.9	97.1
CN_GZ2021C_R.sinicus	91.3	97	92.7	93.9	93.8	93	94.8	95.2	98.8	96.8	94.7	96.3	92.6	95.6	92.1	91.1	77.3	84.3	97.4	93	95.5	93.1	94.8	96.6
CN_GZ2021H_R.sinicus	91.8	97.2	94.9	94	93.9	93.1	94.8	95.2	98.7	97.1	94.7	96.2	92.5	95.5	92.2	92.4	76.8	84.8	97.8	94.8	95.9	94.4	95.6	96.8
CN_HB2013_R.sinicus_(KJ473814)	88.7	94.4	89.4	87.3	89.5	91.2	92.4	91.6	93.9	93.8	91.6	93.1	90.5	91.1	91.2	91.8	77.7	83	97.8	95.1	95.9	93.6	94.1	96.3
CN_HB2020E_R.sp.	88	94.1	86.2	86.4	89.2	89.9	90.8	93.6	92.3	93.2	90.2	94.3	93.3	89.9	90.1	91.2	76.1	83.2	97.4	93.9	95.5	93.3	93.3	96.7
CN_HKU3-1_R.sinicus_(DQ022305)	87.6	94.6	86.5	86	89.1	90.6	91	92	91.6	90.6	92.3	91.6	90.8	89.8	89.7	91.1	76.5	83	97.4	94.8	95.9	93.3	92.6	96.1
CN_HKU3-7_R.sinicus_(GQ153542)	87.5	95.4	85.9	86.2	88.9	90.1	90.9	92	91.6	90.3	92.1	91.9	90.5	89.2	89.6	90.2	76	83.5	96.5	94.5	95.5	94.1	92.6	96.1
CN_HN2021A_R.pusillus	81.9	81.7	68.1	72.9	74.6	83.7	83.3	96.8	97.8	96.8	95.4	97.2	96.1	94.9	88.9	83.6	72	75	93.5	84	81.3	82.7	80.7	90.9
CN_HN2021B_R.pusillus	81.9	81.7	68.1	72.7	74.6	83.7	83.3	96.8	97.8	96.8	95.4	97.2	96.1	94.9	88.9	83.6	72	75	93.5	84	81.3	82.7	80.7	90.9
CN_HN2021C_R.sinicus	87.8	93.9	85.7	86.1	89.7	91	90.8	94	94.6	92.9	95.9	94.1	91	89.8	89.4	91.5	74.2	86.8	95.2	94.6	94.7	93.9	92.6	95.8
CN_HN2021E_R.sinicus	88.5	95.4	88.1	87.2	89.6	90.2	91.1	92.8	94.8	92	92.8	93.9	89.6	90.3	90	90.4	77.7	84	98.3	94.8	95.9	94.7	94.1	96.9
CN_HN2021G_R.pusillus	81.5	81.7	67.7	72.6	73.9	82.4	82.2	96	98	96.5	95.9	96.9	96	94.9	89	83.9	70.1	74.6	93.1	84.3	79.7	82.7	80.7	91.8
CN_JX2021C_R.sinicus	87.7	93.7	85.9	86.1	89	89.3	91.1	92.8	92.8	92.6	91.8	93.1	90.6	90.9	90.2	90.3	76.2	83.6	97.4	94.2	95.5	93.1	93.3	96.7
CN_JX2021D_R.siamensis	88.3	93.3	85.9	86.4	89.7	91	90.8	91.6	94.3	92.9	95.7	94.3	93.8	90.2	89.4	91.3	77.3	83.2	97.4	94	93.9	93.3	94.1	95.6
CN_JX2021G_R.sinicus	88.3	94.1	85.8	86.1	88.9	90.4	91.1	92.4	91.6	92.3	92.8	94.3	96.3	89.9	90.2	90.4	76.6	83.5	97.4	94.9	95.5	93.9	92.6	96.6
CN_JX2021M_R.sinicus	91.1	92.8	88	90.2	93.7	97.1	98.3	96	98.5	96.8	97.8	96.8	96.2	95.5	93.3	92.9	77.3	84	95.7	94.8	95.1	94.1	94.8	96.2
CN_JX2021N_R.sinicus	89.7	94.8	87	87.2	90.2	96.7	98.3	95.6	94.1	93.5	94.7	96.7	95	95.1	91.7	92.6	76.3	83.6	96.5	94.9	95.5	92.5	93.3	96.5
CN_JX2021P_R.sinicus	87.7	93.7	86.1	86.2	89	90.4	90.9	92	92.8	92.9	92.6	91.9	89.8	89.8	91	90.6	75.9	84.3	97.8	93.6	95.5	93.6	92.6	96.5
CN_LN2020A_R.ferrumequinum	86.5	91.3	84.8	86.3	87.9	90.1	89.5	86.7	92.1	92.9	91.1	92.1	90.1	89	88.3	90	73.5	88.1	96.5	94.9	94.7	91.5	94.8	92.8
CN_LN2020C_R.ferrumequinum	84.8	91.3	84.9	77.4	88.1	90	89.3	86.3	91.9	93.2	91.4	92.2	90.2	89.1	87.9	90.1	73.6	87.5	96.5	95.1	95.5	92.3	94.8	92.8
CN_Longquan-140_R.pusillus_(KF294457)	86.6	94.3	73.7	85.5	88.7	89.4	90.9	92.4	92.8	90.3	89.9	91.9	90.3	89.4	89.9	90.2	76	84.2	97	94.2	95.5	92.5	93.3	96.2
CN_LYRa11_R.affinis_(KF569996)	90.3	92.4	86.9	91.3	90.1	92.2	92.8	90.4	93.1	93.2	94	96.8	94	91.8	90.5	90.4	83.8	89.6	98.3	94.5	95.5	93.1	86.7	96.9
CN_PrC31_R.pusillus_(MW703458)	81.4	82.6	68.3	72.4	75.1	84.1	79.9	79.5	86.4	96.2	98.6	97.1	96.2	94.9	91.4	83.8	72.3	75	92.6	83.1	80.1	80.5	81.5	88.2
CN_RaTG13_R.affinis_(MN996532)	78.8	81.9	68.2	72.5	74.3	83.4	79	79.1	86.2	84.7	88.5	88.2	88.2	83.7	80.8	85.5	72.4	76.6	93.9	83.7	79.7	81.1	83	87.9
CN_RaTG15_R.affinis_(GWHBAUP01000001)	74	75.9	63.7	67.6	72.1	78.2	76	74.3	82.5	77.3	82	85.5	86.3	82.9	76.6	80.2	64.3	69.8	85.7	79.5	72.4	61.1	50.4	77.3
CN_Rf1_R.ferrumequinum_(DQ412042)	87.5	91.7	85.2	86.7	88.4	90.4	90.9	87.1	92.4	93.5	91.4	92.4	90.4	90.3	89.5	89.1	74.9	88.5	96.5	95.2	95.9	92.5	94.1	94
CN_Rf4092_R.ferrumequinum_(KY417145)	93.4	97.6	96.1	95.8	96.8	98.1	99.1	98	98.1	99.1	97.6	98	97.3	95.9	92.2	92.3	74.4	89.8	99.6	96.9	97.6	94.9	96.3	98.3
CN_Rm1_R.macrotis_(DQ412043)	87.8	91.5	85.8	85.4	89.5	90.7	91.6	92	94.4	92.6	92.1	93.5	90.1	90.1	89.6	91	77.2	83.5	96.1	94.5	95.9	92.8	95.6	95.9
CN_RmYN02_R.malayanus_(EPI_ISL_412977)	78.6	82.4	68.2	72.3	74.5	83.2	79.8	80.3	86	85	88.5	88.2	88.3	83.5	80.5	84.5	70.3	76.2	94.4	85.2	79.7	81.3	82.2	88.4
CN_RmYN05_R.malayanus_(EPI_ISL_1699445)	74	75.9	63.6	67.6	72.5	78.2	75.9	74.3	82.7	77.3	82	85.5	86.4	83	76.6	79.4	63.8	69.6	85.7	79.5	72	61.3	48.9	77.3
CN_RmYN07_R.malayanus_(EPI_ISL_1699447)	89.5	92.2	87.3	91.3	90.5	92.8	93	91.6	94.1	93.2	93.3	94.7	92.6	92.1	90.4	89.7	76.6	83.5	98.3	95.5	73.2	92	87.4	97.1
CN_Rp3_R.pearsonii_(DQ071615)	92.1	93.5	95	93.7	93.5	96.1	98	96.4	98.7	96.5	97.4	97.9	96.4	95.8	93.5	93.6	77.4	84	97.8	93.4	95.9	93.6	96.3	96.5
CN_RpYN06_R.pusillus_(EPI_ISL_1699446)	78.9	82	68	72.7	74.6	83.7	79.7	80.7	85.9	84.7	88.2	88.2	88.5	82.7	80.5	84.4	72	76.6	93.9	84.9	80.5	81.1	83.7	88.2
CN_Rs4084_R.sinicus_(KY417144)	95.7	97.6	96.9	95.5	96.7	98.5	99	98.8	98.8	98.5	98.6	98.3	96.5	95.8	92.8	93.3	88.7	98.9	98.7	97.2	97.2	94.9	96.3	98.6
CN_Rs4231_R.sinicus_(KY417146)	95.7	97.4	96.7	95.9	96.9	98	98.7	98.8	98.3	97.6	97.1	98.2	95.7	96.2	92.7	93.4	93.2	98.1	98.7	97	97.2	94.9	96.3	98.5
CN_Rs672_R.sinicus_(FJ588686)	91.2	97.8	96.1	86.1	95.8	97.4	98.7	97.2	98	97.1	96.4	97.9	95.7	96.1	92.4	93.1	77	90.3	99.6	97.5	98	94.7	95.6	97.6
CN_Rs7327_R.sinicus_(KY417151)	93.8	97.6	97	95.8	96.8	98.5	98.9	98.8	98.7	98.5	98.6	98.2	96.7	96	92.5	92.8	91	98.7	99.6	97.2	96.3	94.4	96.3	98.6
CN_Rs9401_R.sinicus_(KY417152)	95.5	97.6	96.7	95.9	96.8	98.5	98.9	98.8	98.7	98.5	98.6	98.2	96.8	96	92.5	92.8	91	98.5	98.7	97.8	97.6	94.7	96.3	98.6
CN_RsSHC014_R.sinicus_(KC881005)	95.2	97.8	96.4	95.6	97	98.5	99	98.8	98.8	98.5	98.6	98.4	96.8	95.8	92.9	93.2	88.8	98.9	98.7	97.2	98	94.4	96.3	98.4
CN_RsYN03_R.sinicus_(EPI_ISL_1699443)	90.6	93.1	87.1	93.8	90.5	92.7	93.1	90.8	94.1	93.2	94.5	96.7	96.7	92	92.8	89.3	76.7	83.6	99.1	95.5	95.9	91.5	86.7	97.4
CN_RsYN04_R.stheno_(EPI_ISL_1699444)	74	75.9	63.6	67.6	72.5	78.2	75.9	74.3	82.5	77.3	82	85.5	86.4	83	76.6	79.4	63.8	69.6	85.7	79.5	72	61.3	48.9	77.3
CN_RsYN09_R.stheno_(EPI_ISL_1699449)	90.2	92.8	87.1	94.2	89.7	92	93.2	91.6	93.8	93.2	93.8	95	92.1	91.9	91.5	89.6	80.4	84.3	97.8	95.7	96.7	92.3	85.9	96.8
CN_SC2018_R.sinicus_(MK211374)	90.3	94.6	87	86.7	94	97.3	98.9	98	98.7	99.1	98.1	97.1	96.8	93.2	88.5	91.4	77.3	90	99.1	98.2	96.7	93.3	94.8	96.7
CN_SC2018B_R.sinicus	87.9	94.6	87.5	87.1	88.1	90.2	90.8	88.4	91.6	92.9	92.8	92.8	90.8	89.6	88.8	92.4	76.7	80.9	97	93	95.5	93.1	91.9	96.5
CN_SN2011_R.pusillus_(JX993987)	88.2	93.5	88.2	87.1	88.8	91.4	91.3	92.4	91.2	94.1	92.6	93	90.5	89.6	90.5	92.5	77.3	82.9	97.4	93	96.3	93.1	93.3	96.2
CN_SX2013_R.ferrumequinum_(KJ473813)	87.4	91.5	85.3	86.7	87.9	90.2	91	87.1	91.8	92.9	91.1	92.9	90.7	89.4	88.2	89.3	74.9	88.3	96.5	94.9	95.9	92.3	96.3	93.6
CN_WIV1_R.sinicus_(KF367457)	93.7	97.8	96.3	95.8	96.9	98.4	98.7	98.8	98.8	98.5	98.6	98.3	96.6	95.7	92.8	93.4	90.5	98.6	99.1	97.2	96.7	94.7	95.6	98.4
CN_WIV16_R.sinicus_(KT444582)	94.1	97.8	96.8	95.5	96.8	98	98.6	96.4	98	97.3	97.6	98	95.8	96	92.7	93.4	95.4	98.8	99.1	97.2	96.3	94.1	96.3	98.4
CN_YN2011_C.plicatus_(JX993988)	90.5	92	87.1	95.1	90.2	92.2	93	91.2	93.9	92.9	94.2	94.9	92.3	92.2	93.2	89.5	76.9	89.9	98.7	94.5	96.7	92.5	87.4	97
CN_YN2013_R.sinicus_(KJ473816)	93.9	96.9	96	95.4	96.9	98.5	99	98.8	99.3	98.2	98.3	98.3	96.8	95.8	92.9	93.6	77.3	90.5	98.7	97	97.2	93.6	94.8	97.6
CN_YN2018A_R.sinicus_(MK211375)	93.1	97	95.6	95.2	96.5	98	98.5	96	99.3	99.1	98.1	98	96.7	96.5	93.3	94.1	76.7	90.4	99.6	96.6	98	95.2	95.6	98
CN_YN2018B_R.sinicus_(MK211376)	93.8	97.8	97	95.9	96.7	98.4	98.9	98.8	98.7	98.5	98.6	98.2	96.7	96.2	92.7	94.3	90.6	97.9	99.6	96.9	96.3	94.4	95.6	98.5
CN_YN2018D_R.sinicus_(MK211378)	91.8	98	97.2	95.9	97.1	98.6	98.7	98.8	98.7	98.2	98.6	98.1	96	96.1	92.7	94.2	76.8	96.2	99.6	96.7	96.3	94.7	96.3	98.6
CN_YN2020A_R.affinis	92.5	97.8	95.4	94.1	93.7	97.1	98.9	95.6	96.8	96.8	96.4	97.2	96.5	96.2	93.2	93.8	77.1	89.3	99.6	95.8	98	94.7	96.3	97.2
CN_YN2020B_R.sinicus	95.8	97.8	95.9	95.1	95	97.2	97.9	96	99.5	98.5	97.8	98.2	96.1	95.4	92.8	94.8	93.3	96.7	99.1	98.1	97.2	94.4	95.6	97
CN_YN2020H_R.sinicus	94.8	96.9	96.4	95.2	96.7	98.5	98.4	98.4	98.8	98.5	98.3	97.8	96.1	96.5	92.6	93.1	88.3	96.6	99.1	97	97.6	95.5	94.8	98.1
CN_YN2021_R.pusillus	81.8	82.2	68.4	72.7	74.8	83	79.2	93.6	98.5	98.5	98.3	97.1	96.3	95.4	90.6	83.4	72	74.5	93.1	84.3	78.9	83.2	83	88.3
CN_YNLF_31C_R.ferrumequinum_(KP886808)	92.9	91.1	92.9	95.8	98.1	96.1	98.3	96.4	98.8	99.7	98.6	98.6	97.8	96	92.7	93.6	75.5	88.8	99.6	95.7	93.9	96.5	97	97
CN_ZC45_R.pusillus_(MG772933)	80.5	80.6	68	72.9	73.9	82.8	81.7	92.8	93.4	91.7	92.6	92.4	90.4	89.3	88.9	83.8	72.2	75.4	93.1	83.6	80.1	80.5	79.3	90.4
CN_ZXC21_R.pusillus_(MG772934)	80.6	81.5	68.5	73.3	73.9	82.8	81.7	94.4	93.1	92.9	91.1	92.5	90.7	89.4	88.5	83.7	72.3	75.1	93.1	83.6	80.1	80.8	80	90.3
GXP2V_Pangolin_(MT072864)	78.2	81.7	67.7	72.4	74.8	81.7	79.8	78.7	85.9	85.3	87.1	86.7	83	83	80.2	83.7	72.1	78.3	94.8	83.3	80.5	84	78.5	87.2
GXP4L_Pangolin_(MT040333)	78.2	81.7	67.7	72.5	74.9	81.7	79.8	79.1	85.9	85.3	87.1	86.7	83.2	83	80.2	83.8	72.3	78.3	94.8	83.6	80.5	83.7	77.8	87.2
GXP5E_Pangolin_(MT040336)	78.2	81.7	67.6	72.5	74.7	81.7	79.8	79.1	85.9	85.3	87.1	86.7	83.1	83	80.2	83.8	72.3	78.3	94.8	83.6	80.5	83.7	75.6	87.1
JP_Rco319_R.pusillus_(LC556375)	77.8	81.3	67.7	71.2	74.5	81.5	78.4	83.5	85.4	86.7	88.2	87.1	85.1	85.6	80.7	82.6	71.6	75.9	93.1	86.8	81.7	71.5	74.1	86
KH_RShSTT182_R.shameli_(EPIISL852604)	78.8	81.3	67.5	72.4	74.4	83.9	78.5	79.1	86.4	83.5	88.2	88.3	87.9	83	81.2	84.9	73	75.3	93.5	85.2	78.5	80.5	82.2	88.6
KR_16BO133_R.ferrumequinum_(KY938558)	85.3	91.3	85.1	77.7	88.1	89.9	89.3	87.1	91.8	93.2	91.6	92.3	90.3	89.3	88.5	89.7	73.5	88	97	94.6	95.5	90.7	94.1	92.9
MP789_Pangolin_(MT121216)	78.5	82.6	67.6	72.8	75.5	84.3	80.2	78.7	86.4	85	88.7	85.2	87.6	83	80.7	83.8	72.2	76.2	93.5	84.3	80.1	82.7	80	87.7
TH_RaCS203_R.acuminatus_(MW251308)	78.6	82.4	68	72.3	76.6	83.1	79.2	79.1	86	85.5	87.5	88.1	88.1	82.8	81.3	84.4	70.1	75.7	93.5	84.8	80.1	82.7	80	88.6

## Sheet: Table S5
Table S5 Homology alignment of SARS-COV-2 as query
Strain	Genome	nsp1	nsp2	nsp3	nsp4	nsp5	nsp6	nsp7	nsp8	nsp9	nsp10	nsp12	nsp13	nsp14	nsp15	nsp16	S	orf3a	E	M	orf6	orf7a	orf7b	N
CN_AH2021B_R.sinicus	79.2	81.7	68.8	72.2	76.5	83.8	80.3	83.5	86.2	85.5	89.7	86.8	88.5	83.3	80.7	85.6	71.3	75.2	93.5	84	78.9	84.3	79.3	87.7
CN_Anlong-103_R.sinicus_(KY770858)	78.8	83	68.1	72.2	75.7	83.6	78.9	80.3	86.5	84.4	88.5	88.6	88	82.5	82.3	85.3	70.8	75.6	93.5	84.3	81.7	85.1	82.2	87.7
CN_F46_R.pusillus_(KU973692)	78.4	80.9	67.3	72.5	74.6	84.1	79	79.1	86.4	85	88	88.1	87.9	83.8	81.5	84.8	68.7	75.2	93.5	84.6	80.1	83.7	81.5	88.2
CN_FJ2021D_R.sinicus	79.2	82.2	68.7	72.4	76.9	84.5	80.6	83.1	87	87.6	90.6	86.5	87.7	82.8	81.6	85.2	71.2	75.9	93.5	83.9	79.3	84	80	87.7
CN_GD2016B_R.sinicus	78.5	81.7	68.2	72	76	83.4	79.8	81.9	86.7	83.2	87.5	86.7	87.7	82	82.3	84.7	70.9	75.6	93.1	83.9	79.7	84.3	80.7	88.5
CN_GD2017F_R.affinis	79.1	83.1	68.5	72.2	76	83.2	78.9	81.1	86.9	85	88.2	88.3	88	82.5	82.3	84.4	71	75.8	92.2	83.7	84.1	82.7	82.2	87.3
CN_GD2017H_R.sinicus	79.1	81.7	68	72	76.1	83.3	79.1	81.1	86.9	84.4	89	88.2	88.2	82.5	82.2	84.5	71.1	75.6	93.5	83.9	79.7	83.2	81.5	87.8
CN_GD2017Q_R.sinicus	78.5	80.9	68.1	72	74.3	82.6	79.1	83.5	85.9	84.4	87.8	87.4	88.4	82.9	82.3	84.7	70.8	75.1	93.5	83	78.9	84.8	82.2	88.2
CN_GD2019A_R.sinicus	79	81.3	68.7	72.1	75.5	84.1	79.5	81.1	86.4	83.5	86.8	87.2	88.1	82.5	81.2	84.6	71.1	75.9	93.5	83.3	79.3	84.5	83	88.2
CN_GX2013_R.sinicus_(KJ473815)	78.8	81.9	68.6	72.1	75	83.8	79.3	81.9	86.7	85	88.5	88.4	88.3	82.7	82.2	84.9	71	75.4	93.5	84	80.5	84.5	81.5	87.3
CN_GX2019A_R.siamensis	78.5	82	69.4	72.4	75.6	83.7	79.4	81.5	86.5	83.8	87.3	88.3	88	82.4	82.4	84.4	69.4	75.7	91.8	84	79.3	84	80.7	88.2
CN_GZ2021C_R.sinicus	79.2	82.8	68.6	72.1	75.7	83.7	79.8	80.7	87	83.5	89.7	88.1	88.4	82.9	82.4	84.3	71.4	75.4	94.4	83.6	80.1	84.3	82.2	87.8
CN_GZ2021H_R.sinicus	78.8	81.9	68.6	72.1	75.7	83.6	79.8	80.7	86.5	83.8	89.7	88.1	88.3	82.9	81.9	84.4	71.1	75.6	93.9	84.5	80.1	84.5	82.2	87.7
CN_HB2013_R.sinicus_(KJ473814)	79.2	83.7	68.6	72.5	76	83.4	81.1	82.7	86	85.5	89	87.2	86.9	82.9	81.9	85.4	71	75.3	93.9	84.5	79.7	83.7	83	88.3
CN_HB2020E_R.sp.	79.2	80.9	68.8	72.3	76.4	84	80.3	82.3	85.4	85.8	88	87.8	88.2	83.2	83.3	84.8	70.9	75.3	93.9	83.3	79.3	83.7	81.5	88.2
CN_HKU3-1_R.sinicus_(DQ022305)	78.9	81.9	68.8	71.8	76.5	82.8	80.3	83.1	84.8	87.3	89	85.9	88.2	81.9	81.7	84.4	71.3	75.6	93.9	83.9	78.9	84.5	81.5	88
CN_HKU3-7_R.sinicus_(GQ153542)	79	82.2	68.9	72.1	76.5	83.1	80.2	83.1	84.8	87	90.2	86.4	88.4	82.3	81	84.2	71.2	75.3	93.1	84	79.3	84.3	81.5	88.1
CN_HN2021A_R.pusillus	88	92.2	92.5	90.9	91.1	92.5	90.7	81.5	86	84.4	89.2	88	87.9	82.7	82.9	89.5	75.3	89	99.1	94.5	97.2	92	96.3	91.5
CN_HN2021B_R.pusillus	88	92.2	92.5	90.8	91.1	92.5	90.7	81.5	86	84.4	89.2	88	87.9	82.7	82.9	89.5	75.3	89	99.1	94.5	97.2	92	96.3	91.5
CN_HN2021C_R.sinicus	78.9	82.8	68.9	72.3	75.5	82.7	80.7	82.3	86.2	86.1	90.4	87.6	88	82.6	81.8	85.3	69.7	75.3	92.2	83.9	80.5	84	82.2	88.2
CN_HN2021E_R.sinicus	78.9	82.8	68.9	72.5	75.9	82.6	80.6	81.9	86.5	85.5	89.2	87.8	87.3	82.5	81.9	85.3	71.3	76.2	93.5	84	79.7	84.8	81.5	87.9
CN_HN2021G_R.pusillus	87.7	93.1	91	90.6	92.1	91.4	91.1	80.3	86.9	84.4	88.7	88.3	88.2	82.9	84	89.7	72.9	88.4	98.7	94.6	96.7	90.9	96.3	90.4
CN_JX2021C_R.sinicus	79.2	81.9	68.4	72	76.3	83.2	80.1	80.7	86.9	87	88.5	87.4	88.1	83.2	83.1	84.4	71.1	75	93.9	83.4	78.9	84.3	82.2	88.1
CN_JX2021D_R.siamensis	79.2	82.4	69.3	72.1	75.5	82.7	80.9	81.9	87.4	86.1	90.2	87.7	87.5	82.6	81.4	84.6	71.3	76.6	92.2	84.5	79.3	83.7	83.7	87.6
CN_JX2021G_R.sinicus	78.7	81.9	68.6	72.3	76.5	84.4	80.1	83.1	85.5	86.4	89.9	87.4	88.1	82.7	80.8	85.1	70.8	75.2	93.9	84	78.9	84.5	81.5	88
CN_JX2021M_R.sinicus	78.8	81.3	68.4	72.1	75.3	83.7	79.8	81.1	86.7	85	88.5	88.2	88.2	82.7	82.3	84.9	71.2	75.8	92.6	83.7	79.3	83.7	81.5	87.5
CN_JX2021N_R.sinicus	79	82.4	68	71.8	76.7	83.6	79.8	80.7	86.7	86.1	89.4	88.3	87.4	82.5	81.8	85.4	71	75.9	93.5	83.9	79.3	84	80	88.4
CN_JX2021P_R.sinicus	78.7	81.3	68.6	72.1	76.3	83.7	80.7	82.7	87.2	85.5	89.9	86.4	87.9	83.2	81.5	84.2	71.5	75.8	93.9	83.3	79.3	83.5	80	87.6
CN_LN2020A_R.ferrumequinum	77.6	80	69	72.5	76.4	82.4	80.5	80.7	86.2	85.3	88.5	87.4	86.6	82.2	80.8	84.8	68.1	74.1	91.8	82.7	80.5	82.7	81.5	85.7
CN_LN2020C_R.ferrumequinum	76.1	80	68.8	65.1	76.4	82.5	80	81.1	86	85.5	88.7	87.3	86.6	81.8	80.6	85.2	68.2	73.8	91.3	82.8	81.3	83.7	81.5	86
CN_Longquan-140_R.pusillus_(KF294457)	79.9	82	81.6	72.7	76.5	83.8	80.5	83.1	86.5	87.6	87.8	86.5	87.5	82.8	81.6	84.9	71.1	75.7	93.5	84	79.3	84	80	87.4
CN_LYRa11_R.affinis_(KF569996)	79	80.7	67.6	72.4	74.9	83.4	80.9	82.7	85.2	86.4	87.1	88.1	87.6	83.5	81.3	83.5	72.5	77.1	93.5	84.6	81.3	81.6	80	88.5
CN_PrC31_R.pusillus_(MW703458)	91	96.3	96.3	96.3	96.7	97.5	97	98.8	98.3	88.2	88.7	88.1	87.9	82.8	83.3	90.5	75.4	89.3	99.1	93.6	96.7	96	97.8	97
CN_RaTG13_R.affinis_(MN996532)	96.2	96.3	95.5	95.7	95.8	95.9	96	97.6	98.1	98.8	98.3	97.8	98.1	97.3	96.3	95.7	93.1	96.3	99.6	94.9	98.8	95.7	99.3	96.9
CN_RaTG15_R.affinis_(GWHBAUP01000001)	76.6	83.7	71.6	70.3	77.3	79.8	78.4	82.3	82.2	81.1	84.2	91.3	91.4	89.6	82.5	82.9	62.9	68.8	84.4	77.1	70.7	62.4	54.8	76.4
CN_Rf1_R.ferrumequinum_(DQ412042)	78.2	80.4	68.8	72.2	76.3	82.9	80.9	82.7	86.9	85.5	88	87.2	87.2	81.5	81.2	83.2	69.3	74.6	93.1	82.8	81.7	83.7	81.5	86.5
CN_Rf4092_R.ferrumequinum_(KY417145)	78.5	83	68.1	72.2	75.2	83.6	79.2	79.5	86.4	85	88.2	88.5	88.7	83	82.3	85.1	68.6	75.3	93.1	84.2	80.5	84.5	82.2	87.8
CN_Rm1_R.macrotis_(DQ412043)	78.9	80	68.7	71.7	75.1	84.9	80.1	82.3	86.9	85.3	89	87.4	87.6	81.8	80.9	84.8	71.3	75.3	92.2	84	79.7	83.2	82.2	88
CN_RmYN02_R.malayanus_(EPI_ISL_412977)	93.4	98	97.2	96.4	97.3	96.9	96	97.2	98.5	98.8	99.8	98.4	97.5	97.5	97.9	94.5	71.9	96.4	98.7	94.3	97.6	96.3	92.6	97.3
CN_RmYN05_R.malayanus_(EPI_ISL_1699445)	76.6	83.7	71.5	70.3	77.1	79.8	78.4	82.3	82.3	81.1	84.2	91.3	91.6	89.2	82.7	81.7	63.4	68.8	84.4	77.3	70.3	61.6	53.3	76.7
CN_RmYN07_R.malayanus_(EPI_ISL_1699447)	78.9	81.1	67.3	72.4	75	83.6	80.6	82.3	85.7	85.8	87.8	87.2	86.7	83.5	82.2	83.8	70.7	76.4	92.6	84.9	58.9	82.7	80	87.7
CN_Rp3_R.pearsonii_(DQ071615)	79.1	81.3	68.3	72.3	75.1	83.8	78.9	80.3	86.5	83.8	88.7	88.2	88	83.3	81.7	84.9	71.1	74.7	93.9	84.3	80.1	83.5	82.2	88.1
CN_RpYN06_R.pusillus_(EPI_ISL_1699446)	94.6	98.1	96.4	96.6	98.3	98.5	96.4	97.6	98.3	97.3	98.8	98.4	97.5	97	97.8	93.5	77	96.3	99.1	94	97.6	96.8	97.8	97.7
CN_Rs4084_R.sinicus_(KY417144)	78.8	83	68.7	72.2	74.8	83.4	79.1	81.1	86.9	85	88.7	88.1	88	82.7	82	84.6	72.2	76.4	94.4	83.7	80.5	84.5	83	87.7
CN_Rs4231_R.sinicus_(KY417146)	79.1	82.8	68.4	72.4	75.4	83.7	79.2	81.1	86.4	84.7	88.2	88.6	87.9	83.5	81.9	85.8	71.7	75.9	92.2	83.6	80.1	84.5	83	88.2
CN_Rs672_R.sinicus_(FJ588686)	77.7	82.4	69.1	64.7	75.4	83.1	79.3	81.9	87	85	88.5	88.3	87.4	83	82	85.3	70.7	75.4	93.9	84.3	81.3	84.3	83	87.4
CN_Rs7327_R.sinicus_(KY417151)	77.4	83	68.1	72.3	75.1	83.4	79.2	81.1	86.9	85	88.7	88.4	88.3	83.2	82.1	84.5	71.9	76.2	93.9	84.3	80.5	84.3	83	88.1
CN_Rs9401_R.sinicus_(KY417152)	79.1	83	68.7	72.4	75.1	83.4	79.2	81.1	86.7	85	88.7	88.4	88.4	83.2	82.1	84.5	71.9	76.3	93.1	84	80.5	84.3	83	88.2
CN_RsSHC014_R.sinicus_(KC881005)	79	83	68.5	72.1	75.1	83.4	79.1	81.1	86.9	85	88.7	88.2	88.2	82.6	82.1	84.5	72.1	76.4	94.4	84.3	80.9	84	83	88
CN_RsYN03_R.sinicus_(EPI_ISL_1699443)	79.1	81.3	67.1	72.5	75.1	83.3	80.9	82.7	85.7	86.1	88.2	88.1	88	83.3	83.3	84.3	70.8	76.9	93.1	84.9	80.5	82.7	78.5	87.8
CN_RsYN04_R.stheno_(EPI_ISL_1699444)	76.6	83.7	71.5	70.3	77.1	79.8	78.4	82.3	82.2	81.1	84.2	91.3	91.6	89.2	82.7	81.7	63.4	68.8	84.4	77.3	70.3	61.6	53.3	76.7
CN_RsYN09_R.stheno_(EPI_ISL_1699449)	79.1	81.3	67.8	72.2	75.9	82.9	81	82.7	85.2	86.1	88.5	88.1	87	83.5	82	83.6	71.1	75.9	93.1	84	81.3	82.4	77.8	87.7
CN_SC2018_R.sinicus_(MK211374)	78.9	81.5	69.3	71.7	75.3	83.4	79	81.1	85.7	85	88.7	87.7	87.9	83	80.5	84.9	70.6	75.2	93.1	83.9	80.1	84.8	82.2	87.8
CN_SC2018B_R.sinicus	78.9	83	68.3	72.2	76.5	81.8	80.3	81.1	86.2	84.7	88	87.5	87.9	82.6	82.1	85.2	70.6	71.9	93.1	82.7	80.5	82.9	80.7	87.8
CN_SN2011_R.pusillus_(JX993987)	78.9	83.3	67.7	71.9	75.8	82.8	81.6	81.9	86.2	86.7	89.4	87.5	86.8	82.5	82.5	84.8	70.6	75.3	93.1	83.6	79.7	83.2	81.5	88.2
CN_SX2013_R.ferrumequinum_(KJ473813)	78.3	80.2	69	72.5	76.2	82.7	80.7	82.7	86.4	84.4	88.2	87.6	87.2	82.4	81	83.2	69.4	75	93.1	82.5	81.7	83.7	83	86.6
CN_WIV1_R.sinicus_(KF367457)	77.4	82.4	68.4	72.4	74.9	83.4	79.1	81.1	86.9	85	88.7	88.1	88.1	82.7	82.2	84.7	72.3	76.3	94.4	84.3	80.9	84.5	83	87.9
CN_WIV16_R.sinicus_(KT444582)	77.4	82.6	67.9	72.3	75.2	83.8	79.1	81.1	86.9	84.1	89.4	88.4	88.2	83.2	81.6	85.7	72	76.4	94.4	84.3	80.5	84.5	83	88
CN_YN2011_C.plicatus_(JX993988)	79	80.4	67.6	72.3	76.4	82.9	80.9	82.7	85.4	85.8	88.2	87.7	87.1	83.2	83	83.9	70.8	76	93.5	85.5	81.3	82.4	80	87.8
CN_YN2013_R.sinicus_(KJ473816)	78.9	82	68.1	72.2	75.1	83.4	79.1	81.1	86.5	84.7	88.5	88.7	88.4	83.4	82.5	85.2	70.7	75.6	94.4	84.8	80.5	84.3	84.4	88.3
CN_YN2018A_R.sinicus_(MK211375)	79.2	82.2	68.6	72.3	75	83.6	78.7	81.1	86.9	85.3	89	88.3	88.2	83.6	82.1	85.5	71.2	75.4	93.5	83.9	81.3	84.3	83	88.1
CN_YN2018B_R.sinicus_(MK211376)	77.5	82.8	68.9	72.4	74.9	83.3	79	81.1	86.9	85	88.7	88.5	88.4	83.2	82.4	85.2	72	76.2	93.1	84.3	80.9	84.3	83	88.4
CN_YN2018D_R.sinicus_(MK211378)	77.5	82.8	68.8	72.3	75.3	83.6	78.9	81.1	86.9	85	88.7	88.4	88.1	83	82.3	84.7	71.1	75.7	93.1	84.2	80.9	84.3	83	88.4
CN_YN2020A_R.affinis	79.2	82.6	68.7	72.2	75.2	83.4	78.6	81.5	85.9	85	88.7	88.3	88.2	82.9	82.2	85.6	71.2	76.5	93.5	83.9	81.3	83.7	83	88.3
CN_YN2020B_R.sinicus	78.9	83.3	68.8	72.4	75.5	83.4	79.1	81.1	86.7	84.7	88.7	88.5	88.2	82.6	82.3	86.2	71.9	76	93.9	84.2	81.3	84.3	83	87.1
CN_YN2020H_R.sinicus	79.2	82.4	68.9	72.4	75.3	83.7	78.9	81.5	86.9	85	89	88.2	88.1	83.6	82	84.9	71.9	76	93.5	84.5	80.9	85.1	83	88.2
CN_YN2021_R.pusillus	90.1	97.4	96.3	95.4	94.5	96	95.7	83.5	86	85	88.5	88	88.1	83.3	83.1	90.6	75	88.7	98.7	93.4	95.9	89.9	97.8	97.1
CN_YNLF_31C_R.ferrumequinum_(KP886808)	78.5	80	68.5	72.2	74.8	83.6	79.5	80.3	86.4	85	88.5	88.3	87.8	83.2	82.1	83.6	69.6	75.2	93.1	83.9	79.7	82.7	83.7	87.9
CN_ZC45_R.pusillus_(MG772933)	88	93.1	92.3	91.1	90.3	92.2	91.7	82.7	87.2	86.7	90.9	86.6	88	83	82.9	89.6	75.9	88	98.7	93.4	96.3	89.1	94.8	91.2
CN_ZXC21_R.pusillus_(MG772934)	87.8	93.9	92.9	89.9	90	91.9	91.4	81.1	86.5	84.4	88.7	86.8	88.4	82.7	82.7	89.4	75.5	89.1	98.7	93.4	96.3	89.3	95.6	91.3
GXP2V_Pangolin_(MT072864)	85.6	86.5	82.9	81.1	81.5	86.6	84.9	83.1	87.5	83.2	90.9	88.5	85	85.6	90	89.9	83.7	87.1	97.4	91.2	93.1	86.7	83	91.1
GXP4L_Pangolin_(MT040333)	85.6	86.5	82.9	81.2	81.6	86.6	84.9	83.5	87.5	83.2	90.9	88.5	85.1	85.6	90.1	89.7	83.7	87.1	97.4	91.3	93.1	86.9	82.2	91.1
GXP5E_Pangolin_(MT040336)	85.5	86.5	82.9	81.2	81.4	86.6	84.9	83.5	87.5	83.2	90.9	88.5	85.1	85.6	90	89.7	83.6	87.1	97.4	91.3	93.1	86.9	80	90.9
JP_Rco319_R.pusillus_(LC556375)	79	85.4	72.7	72.2	79.6	85.6	83.6	81.1	85.9	85.5	86.8	85.9	85.3	83.3	81.3	84.2	71.5	83.4	97.4	86.5	89.8	77.1	77.8	88.5
KH_RShSTT182_R.shameli_(EPIISL852604)	92.9	93.5	89.1	92.3	97.3	96.9	96.9	98.4	98.3	97.3	96.2	97.2	98	96.3	93.3	91.1	79.7	94.4	99.1	94.9	96.7	96.3	98.5	94
KR_16BO133_R.ferrumequinum_(KY938558)	76.3	80.6	69.1	65.2	76.3	82.1	80.5	81.9	86.2	85.5	88.7	87.4	86.7	81.7	80.8	84.8	67.8	74	92.6	82.7	81.3	82.4	80.7	85.6
MP789_Pangolin_(MT121216)	90.2	91.5	88.5	88	89.9	93.8	92.9	92	93.4	88.2	95.9	91.3	92.2	88.4	92.1	92.5	84.1	93.4	99.1	93.3	96.7	93.6	91.9	96.2
TH_RaCS203_R.acuminatus_(MW251308)	91.4	91.7	93.2	92.1	90.8	96	97	96.4	97.8	98.2	98.6	96.6	97.7	96.1	93	91.5	70.6	92.1	99.1	94.2	97.2	92.5	94.1	93.3
